# Supplementary material for: Comparative Transcriptome Analysis to Reveal Differentially Expressed Cytochrome P450 in Response to Imidacloprid in the Aphid Lion, Chrysoperla zastrowi sillemi (Esben-Petersen)
Source: MDPI journal article supplement (doi:10.3390/insects13100900), 2022-10-03
Supplement: s1 [file s1]

**Comparative Transcriptome Analysis to Reveal Differentially Expressed Cytochrome P450 in Response to Imidacloprid in Aphid Lion, *Chrysoperla zastrowi sillemi* (Esben-Petersen)**

Jyoti Pathak<sup>1</sup>, Gandhi Gracy Ramasamy<sup>1</sup>, Aditi Agrawal<sup>1</sup>, Subhi Srivastava<sup>1</sup>, Bhusangar Raghavendra Basavaarya<sup>1</sup>, Mohan Muthugounder<sup>1</sup>, Venugopal Kundalagurki Muniyappa<sup>1</sup>, Pratheepa Maria<sup>1</sup>, Anil Rai<sup>2</sup>, Thiruvengadam Venkatesan<sup>1</sup> \*

<sup>1</sup> Division of Genomic Resources, ICAR-National Bureau of Agricultural Insect Resources, P.Bag No: 2491, H.A. Farm Post, Bellary Road, Hebbal, Bangalore-24, India

<sup>2</sup> Centre for Agricultural Bioinformatics, Indian Agricultural statistical Research Institute, Pusa, New Delhi-110012, India

\*Correspondence: tvenkat12@gmail.com

**Table S1** Differentially expressed CYP genes, primers used for real-time validation experiments and fold changes as obtained from EdgeR and qRT-PCR in imidacloprid-resistant populations.

| CYP_Gene           | Protein_ID                       | Fold Change in Transcritome | Fold Change in qRT-PCR | Forward and Reverse Primer Used for qRT-PCR                     | Primer_Length |
|--------------------|----------------------------------|-----------------------------|------------------------|-----------------------------------------------------------------|---------------|
| CYP4419A1          | TRINITY_DN45829_c1_g2_i1 m.24448 | -1.75351                    | -1.62                  | TGCTAATTCACGACCGGAT<br>TC -F<br>TGCCCTGTTTACTCATAGC<br>TTC -R   | 21<br>22      |
| CYP4XK1            | TRINITY_DN48411_c1_g2_i5 m.39401 | -3.18927                    | -1.93                  | TAATACCAGGACCCCAAG<br>GAC -F<br>CCAATGTTCACCAGCACTT<br>G -R     | 21<br>20      |
| CYP4416A10         | TRINITY_DN52793_c3_g3_i2 m.62079 | -1.87088                    | -3.9                   | AGTTGTTGGTGACACAAA<br>TG -F<br>CCAATATTCTGGATTTCGA<br>TGG -R    | 20<br>22      |
| CYP4416A-fragment8 | TRINITY_DN52793_c3_g2_i3 m.62076 | -2.75892                    | -3.05                  | GATAGGCCACACCTCAAG<br>AAG -F<br>AGGAGGAGGTGAAGAAGA<br>GG -R     | 21<br>22      |
| CYP6YL1            | TRINITY_DN52759_c6_g1_i5 m.61630 | -12.6133                    | -5.66                  | CACAATGAGCTATGAAGC<br>TGTG -F<br>CGTGGTGAAGCGATAACA<br>ATG -R   | 22<br>21      |
| CYP6YH6            | TRINITY_DN47883_c2_g1_i1 m.36192 | -2.15479                    | -2.05                  | AGGTGATTTGGGTACTG -F<br>CACCGTTTCGTACAATG -R                    | 17<br>17      |
| CYP9GK-fragment16  | TRINITY_DN51061_c2_g1_i5 m.53627 | -3.09926                    | -3.93                  | ATTTGCCGTAGTGGAAGA<br>GG -F<br>GAAGCAACAGACCATTTT<br>CG -R      | 20<br>20      |
| CYP9GN2            | TRINITY_DN51723_c1_g4_i1 m.57100 | -1.58947                    | -1.51                  | GGAATTTGAACACCCATA<br>CCAG -F<br>GCTGCTTACGAATTAGCTG<br>TC -R   | 22<br>21      |
| CYP9GK6            | TRINITY_DN45934_c4_g3_i2 m.25022 | -7.41136                    | -8.23                  | GTGACTTCTGCATTGGGAT<br>TTC -F<br>TGCTACTGAAGGGAAAGT<br>TGG -R   | 22<br>21      |
| CYP9GK3            | TRINITY_DN51572_c0_g2_i2 m.56121 | 1.643084                    | 3.31                   | AAATGGCGTGACATGAGA<br>GC -F<br>TTACGATCGCGCAACGAA<br>TC -R      | 20<br>20      |
| 28S                |                                  |                             |                        | TGTTTCATGGGCCCGTATTG<br>ATG -F<br>ATGCAGCGGAAAGAGCTT<br>CTAC -R | 22<br>22      |

**Table S2** Total number of genes from different families from the four CYP P450 clans identified in CZS.

| <b>CYP Clan</b>           | <b>Families</b>              | <b>Subfamilies</b> | <b>No. of Genes</b> |
|---------------------------|------------------------------|--------------------|---------------------|
| <b>CYP2 clan</b>          | 18, 304, 305, 4414           | 18A                | 1                   |
|                           |                              | 304V               | 1                   |
|                           |                              | 304W               | 1                   |
|                           |                              | 305W               | 3                   |
|                           |                              | 4414A              | 1                   |
| <b>Total in CYP2 clan</b> | <b>4</b>                     | <b>5</b>           | <b>7</b>            |
| <b>CYP3 clan</b>          | 6, 9, 4418, 4420, 4421, 4422 | 6YH                | 9                   |
|                           |                              | 6YJ                | 1                   |
|                           |                              | 6YK                | 1                   |
|                           |                              | 6YL                | 1                   |
|                           |                              | 9AG                | 1                   |
|                           |                              | 9GK                | 6                   |
|                           |                              | 9GL                | 1                   |
|                           |                              | 9GM                | 1                   |
|                           |                              | 9GN                | 5                   |
|                           |                              | 9GP                | 4                   |
|                           |                              | 4418A,             | 1                   |
|                           |                              | 4418B              | 2                   |
|                           |                              | 4420A              | 1                   |
|                           |                              | 4421A              | 1                   |

---

|                        |                   |           |           |
|------------------------|-------------------|-----------|-----------|
|                        |                   | 4422A     | 2         |
| <b>Total in CYP3 6</b> |                   | <b>15</b> | <b>37</b> |
| <b>clan</b>            |                   |           |           |
| <b>CYP4 clan</b>       | 4, 4236, 4413, 4C |           | 2         |
|                        | 4415, 4416, 4G    |           | 3         |
|                        | 4417, 4419        |           |           |
|                        | 4AA               |           | 1         |
|                        | 4XD               |           | 2         |
|                        | 4XE               |           | 3         |
|                        | 4XF               |           | 4         |
|                        | 4XG               |           | 1         |
|                        | 4XH               |           | 1         |
|                        | 4XJ               |           | 1         |
|                        | 4XK               |           | 1         |
|                        | 4XL               |           | 2         |
|                        | 4XM               |           | 1         |
|                        | 4236B             |           | 1         |
|                        | 4413A             |           | 1         |
|                        | 4415A             |           | 1         |
|                        | 4416A             |           | 11        |
|                        | 4416B             |           | 2         |
|                        | 4416C             |           | 2         |
|                        | 4416D             |           | 2         |
|                        | 4416E             |           | 1         |
|                        | 4417A             |           | 1         |

---

|                      |                    |                       |                 |
|----------------------|--------------------|-----------------------|-----------------|
|                      |                    | 4419A                 | 1               |
| <b>Total in CYP4</b> | <b>7</b>           | <b>22</b>             | <b>45</b>       |
| <b>clan</b>          |                    |                       |                 |
| <b>Mitochondrial</b> | 12, 301, 315,      | 12AR                  | 1               |
| <b>clan</b>          | 334                | 12AS                  | 1               |
|                      |                    | 301A                  | 1               |
|                      |                    | 301B                  | 1               |
|                      |                    | 315A                  | 1               |
|                      |                    | 334Q                  | 1               |
| <b>Total</b>         | <b>in 4</b>        | <b>6</b>              | <b>6</b>        |
| <b>Mitochondrial</b> |                    |                       |                 |
| <b>clan</b>          |                    |                       |                 |
| <b>Total</b>         | <b>21 families</b> | <b>48 Subfamilies</b> | <b>95 Genes</b> |

**Table S3** A comparison of CYP gene numbers in 22 insects including CZS.

| CYP Clan                         |                  | CYP2 | CYP3 | CYP4 | Mitochondrial<br>CYP | Total |
|----------------------------------|------------------|------|------|------|----------------------|-------|
| <i>Chrysoperla</i>               | <i>zastrowii</i> | 7    | 37   | 45   | 6                    | 95    |
| <i>silemii</i>                   |                  |      |      |      |                      |       |
| <i>Drosophila melanogaster</i>   |                  | 7    | 36   | 32   | 12                   | 87    |
| <i>Anopheles gambiae</i>         |                  | 10   | 38   | 43   | 9                    | 100   |
| <i>Tribolium castaneum</i>       |                  | 8    | 68   | 43   | 9                    | 128   |
| <i>Bombyx mori</i>               |                  | 7    | 29   | 35   | 11                   | 82    |
| <i>Helicoverpa armigera</i>      |                  | 8    | 45   | 49   | 10                   | 112   |
| <i>Apis mellifera</i>            |                  | 8    | 31   | 4    | 6                    | 49    |
| <i>Nasonia vitripennis</i>       |                  | 6    | 46   | 31   | 7                    | 90    |
| <i>Tetranychus urticae</i>       |                  | 38   | 9    | 26   | 5                    | 78    |
| <i>Metaseiulus occidentalis</i>  |                  | 16   | 23   | 19   | 5                    | 63    |
| <i>Rhynchophorus ferrugineus</i> |                  | 3    | 43   | 23   | 8                    | 77    |
| <i>Acyrtosiphon pisum</i>        |                  | 10   | 23   | 23   | 8                    | 64    |
| <i>Myzus persicae</i>            |                  | 10   | 25   | 23   | 7                    | 65    |
| <i>Agasicles hydrophila</i>      |                  | 7    | 39   | 30   | 6                    | 82    |
| <i>Leptinotarsa decemlineata</i> |                  | 4    | 39   | 20   | 11                   | 74    |
| <i>Culex quinquefasciatus</i>    |                  | 16   | 89   | 82   | 12                   | 204   |
| <i>Aedes aegypti</i>             |                  | 11   | 84   | 59   | 10                   | 164   |
| <i>Cnaphalocrocis medinalis</i>  |                  | 5    | 16   | 9    | 6                    | 36    |
| <i>Trialeurodes Vaporariorum</i> |                  | 5    | 49   | 15   | 9                    | 78    |
| <i>Pogonomyrmex barbatus</i>     |                  | 8    | 61   | 40   | 6                    | 115   |
| <i>Danaus plexippus</i>          |                  | 8    | 36   | 30   | 12                   | 86    |
| <i>Plutella xylostella</i>       |                  | 10   | 26   | 36   | 13                   | 85    |

\*Data are derived from Feyereisen, (2012), Antony *et al.*, (2019), Zhang *et al.*, (2018), Dermauw *et al.*, (2020) and current study.

**File S1.** CZS 160 CYP protein sequences along with their GenBank accession number.

>ON646299 CYP4416Bfragment2 [369 AA] TRINITY\_DN25400\_c0\_g1\_i1|m.3176

MFLKYIESNIVQILLTSVFLIVYKFSNYIRIFYVSKLPGPPAYPIIGNALHFIGKNKDSSQKFL  
KIFEDYNSFFRLWIGLIPGVCISNPDIQKLLNNKNGLEKSFLMKYFGKEAMGDSIILSDVVKW  
KQNRGIVARGFTPLILKSYFKIFVEKSLMLVEKLDEKLNDGESFDIYEYLSKTTLEAVCGSTM  
GVNIDISNSYSALESFHLGMHRIYHFWEIPNCTYRWDNYKKFNESIKTVREFTHNVFLQK  
KKYYNSKNNENVDEIKSNLKNEFKQPLLEYLIDFAAVNLDFTEGDIEIEANLAIMAGYETLST  
TLSYVILNLALHKYIQNKVCEELFEVLGNDLDRITIAVEDLSKLKYMENV

>ON646300 CYP4AA1 [379 AA] TRINITY\_DN33298\_c0\_g1\_i1|m.4873

NFLGEGELITNTGAKWKQHRKLIQPIFTNNILESFDITFSDSAQSLLTKLSAHSGQDINITSYINNC  
VLDILNEAVLGPINNNCAEDIGESPFKGEIVAPYRLVRPWLLFNWIYELTEVARRELEQKQ  
NLNNFTKKMIEYNKNIDKTKCSGRKSLAMFQEIAERHPNFTHEHDIVQEIRTFMLAGQDSVGS  
ALAFCLYSLAKHQEHQDIVIKELDTIFKDSNRSPNARDLDEMCYLEQCICKETLRLYPSVPLVA  
RKISEDIKLNDKYTIPKNCTVFISPYFTQRLPDIYDPDNFIPSRFSREEILKRHPYSFIPFSAGPR  
NCIGYKFSIMEMKTVISTILRHYRITLSPGKENLTLSWRITIRAGGIWLRRLIPRTS

>ON646301 CYP9AG9 [508 AA] TRINITY\_DN39190\_c0\_g1\_i1|m.7559

MELTTWLLIGAVLYAIWAFLNRRLQYFESLNLPHYVPGVPFFGSMASAVFRVCHISDTVKNIYR  
YNPEAKYIGAFDFMRPVIVLRDLVDIKNVTIKNFDNFPDHQAFIDDSVDPLFGGGLFNIAGER  
WKEARALLSPAFTSSKMKGMFELMVVCGKNFVDYLSKLPEKERKAIATKDMFGKLTNDVIG  
TCAFGININSLNPKNDDFILGKEATTFDGIMSLKFFIARSFPNVMKWFNIFVSDRVERFFTSI  
VSTTIATRDEQGISRPDMLQMMMDARGKEGKNFKLDITSMTAQAFIFFGGFDTTSTQMCHIAH  
ELAINPDIQKRLQDEIDDLERSKGLTYEALNSMLYLDALFNESMRHPQAGFLDRLCVKAF  
ELPPALPGLKPFVVQPGMNWVWIPAVAIHRDPEYHDEPDTFNPDRYYQKKVTINDTQNLGFGI  
GPRSCIGNRFAIMETKLLFFFLSKFNLVPNDKTCSPVYSKKTFSLIPPGGYSLAIEPRTDASA  
YA

>ON646302 CYP4414A1 [499 AA] TRINITY\_DN41144\_c0\_g1\_i1|m.9305

KMISPLLFGILSTLFIYDIFYFINGRPKNFPPGPIRIPFFGSYLFLIFKTLKDVPIELAEWSKKYKS  
NVTSLFLGPYKNIILHDYQTIQILTRNEFDGRPDGFIKLRAGFKRLGIFFTDGDFWLEQRRFAL  
RHMRDFGFGRRSEKLENIIEFEMKEMIKHIENNHYMFKAPHFFAPGFVNLLVSILTGATLDQN  
QRNYLEEIGFHSLLFQKNASPLGGFIGIFPWVRRFAPNVSGYHGSKNNGNDKLIEFVQDLIENRK  
KL RHKEETEGFIDVYLQELNREKANKSSFTPEQLILTCVDFLLPTSSCVEMSLSLLIQRLIHP  
DVQDKMFDEIKSVVGTGRLPTLNDRPSLLYCEATLREGMRIDTPINLGVGRETTTNINVQGY  
DIPKGTLVFANLWQMHHDEILWKDPFAFRPERFLTDDGKRLCKDMTLPFGLGRRVCAGETF  
ARNGMFMFLVGLVQNFKFTVPPGALLPDLSDRANSALLTNCQEFIVQCEPRI

>ON646303 CYP4G281 [560 AA] TRINITY\_DN41208\_c0\_g1\_i1|m.9355

MSAAGPEMVTGTLATASATGAFSATSFFFTLLVPALVLYIYFRVTRRHMIELADKIPGPTGF  
PLIGNALELLGSSDTIFKNVYKRSFEFDQVIKLWIGPKLVFLIDPRDVEVILSSHVYIDKSPEY  
RFFQPWLGNGLLISTGQKWRAHRKLIAPTFLNLVLSFIDLFNANSNAVVEKLRKEGNREFDI  
HDYMSETTVEILLETAMGVSKTTQDKSGFEYAMAVMKMCDILHLRHRVWLRPDWLFNL  
KHGKEQVKLLDIIHGLTKKVARKKEDYKSGKRNFEVSKEQAKSTTVVEGLSFGQSSGLK  
DDLVDVDDNDVGEKKRQAFDLLEASQNGVVLDEEMKEQVDTIMFEGHDTTAAGSSFFLS  
MMGCHPDIEQKVIQEIDEIFGDSDRPATFQDTLEMKYLERCLMETLRMYPPVPIIAREVKTDL  
KLASGDYTIPAGCTVVVATFKLHRQPHIYPNPVFNPDNLFPEKTANRHYYAFVPFSAGPRSC  
VGRKYAMLKLLSTILRNYRVKSTVKEEDFRLQADIILKRAEGFKVKLEPRKRAGGVKA

>ON646304 CYP334Q1 [570 AA] TRINITY\_DN41636\_c0\_g1\_i1|m.9963

MVRPLLRLRRLPFYLQIRNQETSTKIKSIESVPPATTASLHSTDVGTVLGESTIQIKTPSLNEIRV  
KEVDAATQTDSSLKLIQNFDEVPGPRVLKNVANILRYIPSLSTHVTATTIQYILSTGSQVLVGA  
DSRFIKWLFDEYGPVVRLEAPLGGNIVILSRPEHVHAVFKNEGPYPIRSSLDCIEKYRLQYRKY  
KQAGPYIMHGPEWIQLRSKIQTPLESMLDIHFQNLQSSCDRFVKIHKIRNQQEETPAEFHSEIY  
KWSMDCLTIVSFNKGFLDAGGLRPTSEAMALFNALKDATAAIIHKCEGGLKLWKFFVTRD  
WKLLLKQLDTIDNIVNKYIGSIQLAIEDKDSKLSIGPNSLVEALLVKEQLQPEDILTVLVDLMI  
GVNTTSHAMAFLLYHLARNPKVQKKLYNEIRNANLYEINSYEKLPYLQACIKESLRLKPPMP  
VLSRILQQDVIIHNYRIPKDTFVLMATHLASLRDENFENPTKYDPERWIDDTDSGTQSLASIPF  
GFGPKSCLGQKLAMLQLSMMTAKIIKEFNIQYNYGDITAGTKILSNPNRPLKFRFIERN

>ON646305 CYP334Q1 [365 AA] TRINITY\_DN41636\_c0\_g1\_i4|m.9965

MIVNFGSVYQAYFLMEFEFYFLNLQSSCDRFVKIHKIRNQQEETPAEFHSEIYKWSMDCLTIV  
SFNKGFLDAGGLRPTSEAMALFNALKDATAAIIHKCEGGLKLWKFFVTRDWKLLLKQLDT  
IDNIVNKYIGSIQLAIEDKDSKLSIGPNSLVEALLVKEQLQPEDILTVLVDLMIIGVNTTSHAMA  
FLYHLARNPKVQKKLYNEIRNANLYEINSYEKLPYLQACIKESLRLKPPMPVLSRILQQDVII  
HNYRIPKDTFVLMATHLASLRDENFENPTKYDPERWIDDTDSGTQSLASIPFGFGPKSCLGQK  
LAMLQLSMMTAKIIKEFNIQYNYGDITAGTKILSNPNRPLKFRFIERN

>ON646306 CYP4XM1 [385 AA] TRINITY\_DN43093\_c0\_g2\_i1|m.12447

SAGDYWRIRRKMLTPAFHFTILKQFANIFEENSKLAVQNLSKECEKLSLNVAEYINDYALHTLCDT  
TLGCKFESTSAEFSNYKKALHRFGEIAVYRLSRPWVFPDFLNL SYLKYKTIQTIKTLRSFTSKIITS  
RLETWDPNIVDNTTIETTSGRRLYSMLDLLILHMKTNNGIDYKGIEEVDTFVFEHDTTSVAIVN  
MLMLLANHTEVQDNIVRELYSVVGEDISKISYNDLQSLKYLEMCIKETLRLYPSVPFIARTLTEPLE  
LKDGVVLPKGLLCNVHIYDLHDAEYWPEPEKFIPERFTEENCAKRNPF CYVPFSAGPRNCIGQKF  
AILQMKSIISNILFNYILEPIDTPESITLLCDLVIRTEKPVVRVKFRKVRNA

>ON646307 CYP301A1 [490 AA] TRINITY\_DN43909\_c7\_g1\_i2|m.14984

MKFNSKQLIFDCSKLLRTHQQYRLKSYVAQTSEIPATVKPYKDIPGPRPIPLLGN TWRLLP IIGQYQI  
ADFANVCDILHKEYGKICKLSGLVGRPDLLFVYDANEIEKVYRHEGPTPYRPSMPCLVYYKSVVR  
KDFFGDLPGVVG VHGE PWREFRTRVQKPVQLHTVRKYIEPIEVVTNDFI QRMNEMKDENDEMP  
SDFDNEIHKWALECIGRVALDVRLGCLDPNLSPDSETQKIIDA AKYALRNVAILELKMPFWRYIPS  
SLWTKYVKNMNYFIEICMKHIDAAMQRLKQKNVTS DKDSLIERILTSEKDPKIA YVLALDLILVG  
IDTISMAVCSILYQLATRPEEQEKI HQELLKALPDPNTPLTSKHLEQVPY LKAFI KEVFRVYSTVIGN  
GRTLQQDLEICGYHVPKGIQCVFPTIITGNMEDYVTNASTFMPERWLSKHSENSSNNTIHPFASLPY  
GHGARMCLGRRFADLEMQILLAKVSF

>ON646308 CYP301A1 [523 AA] TRINITY\_DN43909\_c7\_g1\_i3|m.14985

MKFNSKQLIFDCSKLLRTHQQYRLKSYVAQTSEIPATVKPYKDIPGPRPIPLLGN TWRLLP IIGQYQI  
ADFANVCDILHKEYGKICKLSGLVGRPDLLFVYDANEIEKVYRHEGPTPYRPSMPCLVYYKSVVR  
KDFFGDLPGVVG VHGE PWREFRTRVQKPVQLHTVRKYIEPIEVVTNDFI QRMNEMKDENDEMP  
SDFDNEIHKWALECIGRVALDVRLGCLDPNLSPDSETQKIIDA AKYALRNVAILELKMPFWRYIPS  
SLWTKYVKNMNYFIEICMKHIDAAMQRLKQKNVTS DKDSLIERILTSEKDPKIA YVLALDLILVG  
IDTISMAVCSILYQLATRPEEQEKI HQELLKALPDPNTPLTSKHLEQVPY LKAFI KEVFRVYSTVIGN  
GRTLQQDLEICGYHVPKGIQCVFPTIITGNMEDYVTNASTFMPERWLSKHSENSSNNTIHPFASLPY  
GHGARMCLGRRFADLEMQILLAKLIRSYKLEYHHEPLKYAVSFMYAPEGELKFKLTKRE

>ON646309 CYP4XE1 [513 AA] TRINITY\_DN44034\_c0\_g1\_i2|m.15326

MLWLIIQICVTLFIGLLVVLVLQQLQKS~~K~~KILLPSPPLIPLLGHALEFGSTAQDIHNNILRLVSTYGK  
LFTIWVGPFNQYCHSDSDVTNKILSSTK~~L~~IEKSGDYDLIKPWLGDGLLISKGTKWFKRRKMLTPAF  
HFTILEQSINTFTEASDRFIENLKKHVNGDTFDVYPYVTLLGLDII~~C~~KTAMGIDLNVQTQPDSEYVT  
AVRDMCRIIFERVFS~~A~~VQQSDFIFYNLTANGKTFKNGLSILHSMTNKVIEERRQLLINDIKNNEVKD  
NGPEKTKDDISFGEKKEKMFMDVLLKSTVDGKPLTNSDIQEEVDTFMFEGHDTVSSGISFTLYLL  
ANHPEIQTRAFEEVRDICGDNLNDQPSLSDLNKMPYLEAIIKESMRLYPPVPVILRNLS~~E~~DLKLDNC  
VLPKHTRATIVIYCIHRNPEYFSDPESFKPERFLEETQNKNYFSYVPFSAGSRNCIGQKFAMYEMKS  
T~~L~~SKVLRHYELCSAGPEFDLKLAMAVILKSLNGVNIKVRPRIYK

>ON646310 CYP4XE1 [476 AA] TRINITY\_DN44034\_c0\_g2\_i7|m.15331

MLWLIIQICVTLFIGLLVVLVLQQLQKS~~K~~KILLPSPPLIPLLGHALEFGSTAQDIHNNILRLVSTYGK  
LFTIWVGPFNQYCHSDSDVTNKILSSTK~~L~~IEKSGDYDLIKPWLGDGLLISKGTKWFKRRKMLTPAF  
HFTILEQSINTFTEASDRFIENLKKHVNGDTFDVYPYVTLLGLDII~~C~~KTAMGIDLNVQTQPDSEYVT  
AVRDMCRIIFERVFS~~A~~VQQSDFIFYNLTANGKTFKNGLSILHSMTNKVIEERRQLLINDIKNNEVKD  
NGPEKTKDDISFGEKKEKMFMDVLLKSTVDGKPLTNSDIQEEVDTFMFEGHDTVSSGISFTLYLL  
ANHPEIQTRAFEEVRDICGDNLNDQPSLSDLNKMPYLEAIIKESMRLYPPVPVILRNLS~~E~~DLKLDNC  
VLPKHTRATIVIYCIHRNPEYFSDPESFKPERFLEETQNKNYFSYVPFSAGSRNCIGLYNLSIVYSFY  
YSIQNR

>ON646311 CYP4XJ1[493 AA] TRINITY\_DN44036\_c1\_g1\_i1|m.15597

MILVYALITFYIFWKYIKFYKLQKIFVNIPSPKGYPILGNYLDFINSSDSEIFKLTCDR~~C~~STYYPRLW  
AVWIWMKPALILHKA~~E~~HIEAILKGVIP~~T~~KKSRVYKYVEPWLGQSL~~L~~TSAGMHWKTH~~R~~KLLTPAF  
HFTILKEFQSVISEKADILVDR~~L~~KTAMENNQEIELLPYINQCTLDVICETSMGVSINAQSDSPPVYYE  
AITNFTELA~~I~~KRQFSMFGKYEFLWN~~L~~TSQGR~~R~~QNECLKILHDFADAVI~~Q~~ERKHK~~L~~QQNITDEN~~N~~NE  
EDNRK~~L~~KPFLDIMLESDEPLTDKEIRDEVSTFLFAGHDTSS~~T~~NINWTLFLLGNYPHIQDRVYEELNS  
IFNGSKRHATNDDLIEMKYLEMCIKESLRMYP~~S~~APRISR~~V~~ITEDTNIDGYFIPKNTSVCIHIYKVHHD  
PEHFSQPETFNPDN~~F~~L~~P~~ENIAKRHPFSYIPFSAGARNCIGQKFAIQEI~~K~~LILSSILRNFKVISLTNQHDV  
QIQSAFILTSKEGLKFRLV~~P~~RL

>ON646312 CYP4415A1 [529 AA] TRINITY\_DN44522\_c0\_g1\_i1|m.17308

MYSRIAGTLLNYKFFNKLTIYLG~~L~~VVVCIFLVKIKNTLLRQWKIYIQLRWLPGPEKTPVFLGNSY  
MFFNCNTADIYNV~~F~~VKLINKYGRKSAFKFWVG~~N~~KVFIILTKPEDLRILYNSQYAMEKEHTLYQMF  
SEWLGND~~S~~LLIAPVEKWK~~A~~HRRILAMTFSQRVLDNFVQIFSKNSVNLSNELQSYADNKEIFNVYN  
VINKYTVKSICGTLMGVEIKDEHFVQKYLTAVQKEAEI~~I~~YLMCKFWLHFNIIYKFSKMYEDET~~K~~  
YLKILHSFSKMVFMKKNISYSNENSFSSSSSKKFGINPKRKP~~F~~LELLLDLKRNCIHYDQ~~N~~QILDDMNI  
FLAAGTETTSITSS~~F~~VLLMLGIHQNIQDKVYEELNRILNDDKNEHEKNKNRMITPDDIRQMFYLEM  
VIKETLRLYPIVPIVARTITKDLMLPTSGTIPSGCCCIAAPIAVHYDPEIWTQPLLFNPDRFLSEEKIK  
RHIYSFIPFSGGLRNCIGKKFAFMSLKVLIASIRDYQILTPLKMEDIQLKVEVTLSVNV~~T~~STFN

>ON646313 CYP4415A1 [533 AA] TRINITY\_DN44522\_c0\_g1\_i3|m.17311

MYSRIAGTLLNYKFFNKLTIYLG~~L~~VVVCIFLVKIKNTLLRQWKIYIQLRWLPGPEKTPVFLGNSY  
MFFNCNTADIYNV~~F~~VKLINKYGRKSAFKFWVG~~N~~KVFIILTKPEDLRILYNSQYAMEKEHTLYQMF  
SEWLGND~~S~~LLIAPVEKWK~~A~~HRRILAMTFSQRVLDNFVQIFSKNSVNLSNELQSYADNKEIFNVYN  
VINKYTVKSICGTLMGVEIKDEHFVQKYLTAVQKEAEI~~I~~YLMCKFWLHFNIIYKFSKMYEDET~~K~~  
YLKILHSFSKMVFMKKNISYSNENSFSSSSSKKFGINPKRKP~~F~~LELLLDLKRNCIHYDQ~~N~~QILDDMNI  
FLAAGTETTSITSS~~F~~VLLMLGIHQNIQDKVYEELNRILNDDKNEHEKNKNRMITPDDIRQMFYLEM  
VIKETLRLYPIVPIVARTITKDLMLPTSGTIPSGCCCIAAPIAVHYDPEIWTQPLLFNPDRFLSEEKIK  
RHIYSFIPFSGGLRNCIGKKFAFMSLKVLIASIRDYQILTPLKMEDIQLKVEVTLSVNGYPIQLV~~R~~  
RR

>ON646314 CYP6YH4 [370 AA] TRINITY\_DN44806\_c1\_g3\_i1|m.18595

MRNMFTLLDGFGEDLNKYIKNHVNKTIEVKDACRKYTTD~~V~~IVSTAFGIQANSFSDEEAEFSAISK~~K~~  
LFTFTLRRSVELICFFFVPELVTLFNFKLFSSFGTAFLRNAVSQAIEVREKNNINRPDLIDALIKLKNT

GTLEDSPDLNDKQDHNKATIKFEGDILAAQAAVFFTAGFETTSSAISFTLYFLSYNPDIQIRLRKEIQ  
TVIAENSGKFTYDSLAEKMYLDLCIKETLRLYPSLGFLDREAMSTYTFPGTDLTIDKGTVPVILSTGL  
HRDPQYFENPEVYDPERFNDENKSKFPPFAYIPFGEGPRNCVGARFGMVATKVGLVHILKDFEVV  
TFKTAPTLEIDPRGFLTSPKHGINLNFVKGTVYV

>ON646315 CYP6YH4 [520 AA] TRINITY\_DN44806\_c1\_g3\_i2|m.18597

MALISSSWYTDLLTLTTGLLTILYFYLTSTYDYWKKRKVPYDPPVLLFGNFYNAFTFKRNISSYFY  
DLYRKTNEKYFGFYIYRRPYLLLRDPELIKHVLVKDFNNFVPRTNADTTNKEDVLGRDNIFTIKDP  
HNWRYLRAKFSPPFSTGKMRNMFLLDGFGEGLNKYIKNHVNKTIEVKDACRKYTTDVIVSTAF  
GIQANSFSDEEAEFSAISKKLFTFTLRRSVELICFFVPELVTLFNFKLFSSFGTAFLRNAVSQAIEVR  
EKNINRNPDLIDALIKLKNTGTLEDSPDLNDKQDHNKATIKFEGDILAAQAAVFFTAGFETTSSAIS  
FTLYFLSYNPDIQIRLRKEIQTVIAENSGKFTYDSLAEKMYLDLCIKETLRLYPSLGFLDREAMSTY  
TFPGTDLTIDKGTVPVILSTGLHRDPQYFENPEVYDPERFNDENKSKFPPFAYIPFGEGPRNCVGARF  
GMVATKVGLVHILKDFEVVTFKTAPTLEIDPRGFLTSPKHGINLNFVKGTVYV

>ON646316 CYP304W1 [510 AA] TRINITY\_DN45051\_c0\_g2\_i5|m.20044

MVSPLIVVIAITYFAYWILEFLLARPKNFPPGPIRIPIFGSYLILLRDLVKHFYVETQRWCDKYNSK  
VVALFIGSYNAVSVNDLEGIRRVFLCNDFDGRFPFYSVQLRSWAKRLGVFFTEGPFWLEQRRFTL  
RYMRDFGFGRRMERLEYIIEDETKLMIKLIEEGTKNPYNAGLVKDGRLIYLPEFFAAPFINSYLA  
TGHPLPEESRPILRKTQSSILFQLAADATGGIISILPSLRYIFPKLSGYHGITKGHEALMDLMRDIK  
QRKNRGFTETEGFIDFYLNEMKARKEAGGYTTFSDQQLLIVADLLMPASSAVQSQLGMLVERLI  
HNPEIQDKIYNEIKTVVSGRLPTLDDRPNLPCYCATLRESLRIDTLATLGVPHSTLVDTTLHGYSIP  
KDTIVITNLWQMHHDKEVWGDPEFTRPERFVTEGDKGLAKDQSLPFGLGRRVCAGETFARNTMF  
LIYTGLLQNYKLTVPGEHPLPDLNDRNLNGLVISPKDFWVKCIPRK

>ON646317 CYP4XH1 [461 AA] TRINITY\_DN45641\_c0\_g1\_i3|m.23169

TIILILSLIVGKYIEYRWKNRRFFKLAAKFNGPDPLPFIGNAHMFSGTSEDVFKQILDHFYNYNDKG  
PSRFLWGNQLYVVITKPKQHMKAVALTNPNALQKSYVVSFINTWLGTGLFSAPVTIWKHHRKIIMPS  
FNQKILDTFISIFQERSNVLAKKLECETGYFDIFPYVSRCTLDSICESALGITVNSLEDSNEKYVECA  
TRVLDIVNTRMLKVWLHPDFIFKRTKLYRELQFHIQYLHNFTDSIIKQKRAEFKEIQESNRFSPDQ  
TNDEPIFKRKAFIGLLMETSDFTEDEIRNEVDVTMTVAGNDTTATVNSFTLLLLAMYPDIEKLYNE  
VYSIVGSDSKTIELEDLPKLKYTEMVIKESMRLFPPIGPILGRDALEDIQLDENYTIPKGSIALGIYY  
THRDPEYWNEPDVFDPERFQPEELKTRDPYSYLPFSGGPRNCLGKILLFLCQKTGTSPV

>ON646318 CYP4XH1 [535 AA] TRINITY\_DN45641\_c0\_g2\_i1|m.23171

MVLPAFCSIFFATYDWVSDSKEHSTSANYHIFPTITILILSLIVGKYIEYRWKNRRFFKLAAKFNGPD  
PLPFIGNAHMFSGTSEDVFKQILDHFYNYNDKGPSRFLWGNQLYVVITKPKQHMKAVALTNPNALQ  
KSYVVSFINTWLGTGLFSAPVTIWKHHRKIIMPSFNQKILDTFISIFQERSNVLAKKLECETGYFDIF  
PYVSRCTLDSICESALGITVNSLEDSNEKYVECATRVLDIVNTRMLKVWLHPDFIFKRTKLYRELQ  
FHIQYLHNFTDSIIKQKRAEFKEIQESNRFSPDQTNDEPIFKRKAFIGLLMETSDFTEDEIRNEVD  
MTVAGNDTTATVNSFTLLLLAMYPDIEKLYNEVYSIVGSDSKTIELEDLPKLKYTEMVIKESMR  
LFPPIGPILGRDALEDIQLDENYTIPKGSIALGIYYTHRDPEYWNEPDVFDPERFQPEELKTRDPYSY  
LPFSGGPRNCLGIKYAYMAMKILIATVIRHYKLSTDLKLDDILKTELTLKLSNAFLLRQKRQTM  
Q

>ON646319 CYP4XH1 [372 AA] TRINITY\_DN45641\_c0\_g1\_i6|m.23173

MPSFNQKILDTFISIFQERSNVLAKKLECETGYFDIFPYVSRCTLDSICESALGITVNSLEDSNEKYV  
ECATRVLDIVNTRMLKVWLHPDFIFKRTKLYRELQFHIQYLHNFTDSIIKQKRAEFKEIQESNRFSP  
DQTNDEPIFKRKAFIGLLMETSDFTEDEIRNEVDVTMTVAGNDTTATVNSFTLLLLAMYPDIEKLY  
NEVYSIVGSDSKTIELEDLPKLKYTEMVIKESMRLFPPIGPILGRDALEDIQLDENYTIPKGSIALG  
IYYTHRDPEYWNEPDVFDPERFQPEELKTRDPYSYLPFSGGPRNCLGIKYAYMAMKILIATVIRHY  
KLSTDLKLDDILKTELTLKLSNAFLLRQKRQTMMSQ

>ON646320 CYP6YH5 [528 AA] TRINITY\_DN45681\_c1\_g1\_i1|m.23301

MSFITSNWL TNCLPILTFVLT VLYIY LNSKYN YWKKRN VPYEKPNLIFGNFYETFTLKKNL TTFQEQYEKTNERVYGLYIFQRPYLLLRDPELAKYVLVKDFNNFIARSNSEAPNDSL GKNNL FSLKNIHHWRFMR TKMSPFSPSKMRNLFELFDEIGVQLTEHIKKHVNETMDVKDVSQKYTTD VIVSAAFGIQANSFTSDQAEFSGIAKIMFTYTLKRSIELFSFFFAPLLVKIFNFKFFGEEASQFLRKVVWHTIQVREENNIKR PDLIDALITLKTGT MEDSLVSEKNVGESGIKLQDSIELEGDVLVAQAAVFFTAGFGTSSLTMSFTLHSLSYNPEIQMKLRKEIQSVIARNGGKFTYDCLQEMKYLDACVKETLRLYPTLGMLDREAINTYTFPGTDITIDKGTAVVISLGGLHRDPQYFENPYVYDPERFNDDNKNRIKPFTYMPFGEGPRNCIGARFGSVATKVGLVHILKDFELETYEKPPPLEVNP RSVFLSPKNGIHLKLRTGT VYEQLNEVD

>ON646321 CYP6YH5 [448 AA] TRINITY\_DN45681\_c1\_g1\_i4|m.23306

IFQRPYLLLRDPELAKYVLVKDFNNFIARSNSEAPNDSL GKNNL FSLKNIHHWRFMR TKMSPFSPSKMRNLFELFDEIGVQLTEHIKKHVNETMDVKDVSQKYTTDLIVSAAFGIQANSFTSDQAEFSGIAKIMFTYTLKRSIELFSFFFAPLLVKIFNFKFFGEEASQFLRKVVWHTIQVREENNIKR PDLIDALITLKTGT MEDSLVSEKNVGESGIKLQDSIELEGDVLVAQAAVFFTAGFGTSSLTMSFTLHSLSYNPEIQMKLRKEIQSVIARNGGKFTYDCLQEMKYLDACVKETLRLYPTLGMLDREAINTYTFPGTDITIDKGTAVVISLGGLHRDPQYFENPYVYDPERFNEDNKNRIKPFTYMPFGEGPRNCIGARFGSVATKVLVHILKDFELETYEKPPPLEVNP RSVFLSPKNGIHLKLRTGT VYEQLNEVD

>ON646322 CYP4416C1 [467 AA] TRINITY\_DN45691\_c0\_g1\_i3|m.23335

MFLKLFLNCFQNN SQIGLVLLVLVIVLIYMYNTNYLRIVY YLSKIPGPKSYPIIGVAYLVIGKTHAEITQLVIDMINKFSPILKAYLGPIPLVCVSSPEYVREILTNNHGLEKPWLMTHIAVDVAGDSILSAQVPKWKHNR SKIVRGFTPNILKTYFKVMIESSLLLSKKLEDKLNDSKSF DILEYLSKAAMD SVARSTMGVNVNVQDSGSTFYGAMQSMFHIAFDRIYSPWKLLDVIFRLSQDFPRFSQDKKAVIELAEKIISEKRYQKTCINNNDNKSDNIETIDKELSEKSLLDILLEVTKN DPLFDDQQLKDEVIFMIIAGFETTANALGYVLLNLAVHQDIQNKVCEELFQVVDDFDRKIHLDDL PQLKYM MEMVIKESMRLHPTIPLIARKLTRDIKFDEYLVPDGT TVVPIICLHRNENIWDPLKFDPERFTPENSKNRHPY AFLPFSAGPRNCV GKG N

>ON646323 CYP4416C1 [518 AA] TRINITY\_DN45691\_c0\_g1\_i5|m.23337

MFLKLFLNCFQNN SQIGLVLLVLVIVLIYMYNTNYLRIVY YLSKIPGPKSYPIIGVAYLVIGKTHAEITQLVIDMINKFSPILKAYLGPIPLVCVSSPEYVREILTNNHGLEKPWLMTHIAVDVAGDSILSAQVPKWKHNR SKIVRGFTPNILKTYFKVMIESSLLLSKKLEDKLNDSKSF DILEYLSKAAMD SVARSTMGVNVNVQDSGSTFYGAMQSMFHIAFDRIYSPWKLLDVIFRLSQDFPRFSQDKKAVIELAEKIISEKRYQKTCINNNDNKSDNIETIDKELSEKSLLDILLEVTKN DPLFDDQQLKDEVIFMIIAGFETTANALGYVLLNLAVHQDIQNKVCEELFQVVDDFDRKIHLDDL PQLKYM MEMVIKESMRLHPTIPLIARKLTRDIKFDEYLVPDGT TVVPIICLHRNENIWDPLKFDPERFTPENSKNRHPY AFLPFSAGPRNCV GIRY AWMFMKVVLATLLSRYEFHTD VDVN KLEHEFALS KLLGGHQVRITPRRRN

>ON646324 CYP4416C1 [518 AA] TRINITY\_DN45691\_c0\_g1\_i11|m.23341

MFLKLFLNCFQNN SQIGLVLLVLVIVLIYMYNTNYLRIVY YLSKIPGPKSYPIIGVAYLVIGKTHAEITQLVIDLINKFSPILKAYLGPIPLVCVSSPEYVREILTNNHGLEKPWLMTHIAVDVAGDSILSAQVPKWKHNR SKIVRGFTPNILKTYFKVMIESSLLLSKKLEDKLNDSKSF DILEYLSKAAMD SVARSTMGVNVNVQDSGSTFYGAMQSMFHIAFDRIYSPWKLLDVIFRLSQDFQRF S QDKKAVIELAEKIISEKRYQKTCINNNDNKSDNIETIDKELSEKSLLDILLEVTKN DPLFDDQQLKDEVIFMIIAGFETTANALGYVLLNLAVHQDIQNKVCEELFQVVDDFDRKIHLDDL PQLKYM MEMVIKESMRLHPTIPLIARKLTRDIKFDEYLVPDGT TVVPIICLHRNENIWDPLKFDPERFTPENSKNRHPY AFLPFSAGPRNCV GIRY AWMFMKVVLATLLSRYEFHTD VDVN KLEHEFALS KLLGGHQVRITPRRRN

>ON646325 CYP4416C2 [495 AA] TRINITY\_DN45691\_c0\_g1\_i7|m.23338

MFLKLFLNCFQNN SQIGLVLLVLVIVLIYMYNTNYLRIVY YLSKIPGPKSYPIIGVAYLVIGKTHAEITQLVIDLINKFSPILKAYLGPIPLVCVSSPEYVREILTNNHGLEKPWLMTHIAVDVAGDSILSAQVPKWKHNR SKIVRGFTPNILKTYFKVMIESSLLLSKKLEDKLNDSKSF DILEYLSKAAMD SVARSTMGVNVNVQDSGSTFYGAMQSMFHIAFDRIYSPWKLLDVIFRLSQDFPRFSQDKKAVIELAEKIISEKRYQKTCINNNDNNSDNIESIDKELSGKSLLDILLEVTKN DPLFDDQQLKDEVIFMIIAGFETTANALGYILLNLAVHQDIQNKVCEELFQVLDDSDRKIELDDL PQLKYM MEMVIKESMRLHPTIPLIARKITRDIKFDEYLVPDGT TVVPIICLHRNENIWDPLKFDPERFTPENSKNRHPY AFLPFSAGPRNCV GIRY AWMFMKVVLATLLTRYEFHTDIDVN KLEH

>ON646326 CYP315A1 [486 AA] TRINITY\_DN45615\_c0\_g2\_i2|m.23475

MINRIVSRTISTANNKLINNNANATVQQLSQIPQPQTLPIIGSTLALLLSGGSAKLHEYIDKRHQQ  
LGNIFIDQLGPTKCVFILDPNDMRKVFNNNEGKYPAHYPEAWKLYNQLKNCERGLFFMDGTEWL  
VFRIMNKTLLREDLETIFYEPCRIVADNVTNIWLESQQTEVLNLHDILYRWSVESVTSILLGTHYM  
KNHKKLQPSITKLVRVMQDVFETTSKISLIPANFAYKFKLPAWRRFETAVDLALERANALSSMILD  
MHENGGGVLERLLENGISKKDSIRVMTDLLLAAGDTTAHTMEWLLYLLAKNPNIQNDIYRESLTV  
PDMSDPPALLKGAVREALRLYPVAPFLNRILPNDINIQQYDIPAGTLLILSLYSSGRCEKYFNSPEKF  
WPERWLRCDLGESMNYSNLRAAVAHASMPFAMGSRSCIGKKLAEAQMYVTIRMILNKFSLELLN  
TNNIEMVMRLVGVPSEPIRIALHKR

>ON646327 CYP4419A1 [493 AA] TRINITY\_DN45829\_c1\_g2\_i1|m.24448

MSPVLVFCIVLLVLYILIKYNWDRRDLYKLSWKLEGPFAPIIGNAFFFLFNSIEDTIPIAFDLLKKY  
NGILRGWMGPQLWIFTANPNDIQHILSSQKITHKGAAYRFFNPFGQGLINNNGQLWRMHRKIIVK  
SFSQDFLSEYMHIFHEQSKVMVANMQKEVGKPAFDMKYVQLCAMDIVGEAVMDVKLVQSE  
HNMEVVSSLDNIYMLIHDRILKYWLHPDFIFENTAKGKLQHKVVNYLRNFIQKNVLRKQEEVSNN  
NSIKCKSTLETILHTLNDNPEAMSKQGIIDEMITLFAAGEDSISLQFSWTLLLLALHPEIQDKVYNEI  
QSVLGDNENFGRDDLKLYTTMVIKEVSRLFPVAPFVREVTEDFPIDKVVLPRGTSVFIGVMYV  
HRDPSHWEYPNKFYPEHFLPEAVAKRHPFAFMPFSAGARGCIGKEFAMLCMKSMVLTLRNFQLQ  
ADGTINDIKLKVDIARSMNGYNLRLVQRINTL

>ON646328 CYP9GK1 [384 AA] TRINITY\_DN45823\_c2\_g2\_i1|m.24474

IGLFYWKFVRPLSLWKDKLPYVKGYPIVGNYLGPVLGRLSFAEAIQVYYNATSEEKCAGIFVN  
QPQLMIRDPQLIKQMFIDFDHFTDHTTVFFTEGFDITFDKNLFALKGNDWRDMRATLSPAFTGV  
KMRGMFQVMNECGEQVYHHYSNELKALKDSSHLELDLKDLEFTRFTNDIIASTAFGVKCDSEKND  
KNDDFFVMGRKATTISTLRFLLVNFMPAVMKLLRLSVIPIYVCDYFRNVVKETTEIRVRENIVRPM  
LNLMEAKKGALKVEEQKEENRGFAVADEYNNHHGKIKILNDDDVAAQAFIFFFFAGFETVSTAM  
CFLGYELALNPDIQERVYAEIQDVLESNNGKLSYDILNKMKYLDMCVSESLRKWPPAVLT

>ON646329 CYP4413A1 [407 AA] TRINITY\_DN45909\_c0\_g1\_i6|m.24917

MFLIFLAITFILFIVFDTIFRFQNRKLSLLAKQVPGPWGLPFLGMWYTVIDGPKGFLRLTSNLVKKY  
GNICRAWMGYSLYLVVSKPEDIEAILTNSVEKDYYLKFTSIFAGDGLFIAPAQIWKHRRKLINPTFN  
TKIVNSFHEKMVAKSNVLCKKLETRTSEDNYFDCYDSLFACTLDILFETNLDFSVDQNGQLPYYL  
KYMKRITRLVVLWMGKFWLHTNITFNHNSNFGKKLMQETQYMKRISANIIQEKTVIRKKMSDEN  
YTGNKVQKPFLEHIIYAKESGFPISETSVVNEVDTMIIAGSDTSAYVMSFALMTLGVLDIQDKVH  
EEIISVFGNSDRECTLDDIKSMQYLEMVIKETMRLFAPTPLLARKVTTDVQLRKLSQFKTSKNKQL  
TELIIEIPCIV

>ON646330 CYP4413A1 [494 AA] TRINITY\_DN45909\_c0\_g3\_i3|m.24923

MFLIFLAITFILFIVFDTIFRFQNRKLSLLAKQVPGPWGLPFLGMWYTVIDGPKGFLRLTSNLVKKY  
GNICRAWMGYSLYLVVSKPEDIEAILTNSVEKDYYLKFTSIFAGDGLFIAPAQIWKHRRKLINPTFN  
TKIVNSFHEKMVAKSNVLCKKLETRTSEDNYFDCYDSLFACTLDILFETNLDFSVDQNGQLPYYL  
KYMKRITRLVVLWMGKFWLHTNITFNHNSNFGKKLMQETQYMKRISANIIQEKTVIRKKMSDEN  
YTGNKVQKPFLEHIIYAKESGFPISETSVVNEVDTMIIAGSDTSAYVMSFALMTLGVLDIQDKVH  
EEIISVFGNSDRECTLDDIKSMQYLEMVIKETMRLFAPTPLLARKVTTDVQLPNVVVPANTNCIICV  
LELHRSSDIYSPLKFDPNRFLPEETAKRHPYAYIPFGGGARGCIGPKFAYLSMKIILTSILRKYKIYS  
DVNLENMELKMELFLKPVNGFRIRLEKR

>ON646331 CYP4413A1 [423 AA] TRINITY\_DN45909\_c0\_g3\_i5|m.24926

MSYNSLRRCRIRADATLHMAILTNSVEKDYYLKFTSIFAGDGLFIAPAQIWKHRRKLINPTFNTKIVN  
SFHEKMVAKSNVLCKKLETRTSEDNYFDCYDSLFACTLDILFETNLDFSVDQNGQLPYYLKYM  
KRITRLVVLWMGKFWLHTNITFNHNSNFGKKLMQETQYMKRISANIIQEKTVIRKKMSDENYTGNK  
VQKPFLEHIIYAKESGFPISETSVVNEVDTMIIAGSDTSAYVMSFALMTLGVLDIQDKVHEEIIISV  
FGNSDRECTLDDIKSMQYLEMVIKETMRLFAPTPLLARKVTTDVQLPNVVVPANTNCIICVLELHRS  
SDIYSPLKFDPNRFLPEETAKRHPYAYIPFGGGARGCIGPKFAYLSMKIILTSILRKYKIYSDVNLE  
NMELKMELFLKPVNGFRIRLEKR

>ON646332 CYP9GK6 [525 AA] TRINITY\_DN45934\_c4\_g3\_i2|m.25022

MWLITFSLVGVFYFYWNFIRPLNTWKNYGIPYIKGWPLVGNFLKNALKRESFGDAVISMYKAFPN  
EPYCGSFVFSAPRLLIRDANLLKDIGIKDFDHFTHDTKIFFGDGDFDPIFDKNLFSLDGQNWDRMRAT  
LSPAFTGSKMRGIFVLMNECGNQLVNYLNDKIKTENNQKHLELELKDLFTRFTNDIIATTAFGIKV  
DSLKEPENKFYLMGREVTYFSTFRLFLMNFIPITIMRLNIGILSKAACGYFRNLVFQTISMRETQKI  
VRPDMLNILLQTKNGLLKNDDKGDDNGGFAAAATEGKVGGKIRKLTDEDVTAQAFIFFLAGFDTV  
STAMCFTVYELALNPDIQQRLYSEINDALDGNPNAEVTYETLHRMKYLDMISESRLKWPPAVFID  
RECTKPYRLKTDNGKEIMIPTDMGIVIPIMGIHRDPKYYPNPEKFDPERFSDENKSKINMNAYLPFG  
VGPRVCIGSRFALMETKILIVHLIINFEVILTSKSTVPPRLSTQSSNMAIENGFNVLKPRNF

>ON646333 CYP304V1 [513 AA] DN46134\_c0\_g2\_i1|m.26206

MSLIIFILLIILIFLIYLLIKNAYTRPENFPPGPPRLPIWGSYWILLALNYKFPHLALRELGKRYKTNV  
LGFYLGQTPAVITLNYETTHEMLTRSEFTNRQVNFVIKKRAFGQENLGIFFSYGDFWKEQRRYSRLR  
TMRDFGLGRRSPNLENNVADEVKKLMTMICNGSPNEIEKTVCKEKFHILLPHGLFSGFFNAFWYV  
LTGDTYSDPYKSHKVFQNALKFQRSGEPLGGALVYTPWLRYIWPKNKSGHVPTFESHFELVDFFKD  
YIKEIKENLSEDHSTGYIHEYLLLELKKQNPETYSTFSEDQLLLTLVDHLIPSIVANTTVLAFTFLRILH  
NPHVQTKIQQEIDTVVGSGRYPTLDDRSKMIYTEATIKEGLRMDALNPLGIPRECNDQTYFQGYFI  
PKGTFMVPGNHSSNMDTKLWGDPENFRPERFIDTNGHLVKKDYALLFGAGKRVCVGETFSRQN  
MFLFLSMLMQNFQFSVPDGESELPETTYQNYINGINVPAPKEFWIYAKPRF

>ON646334 CYP4416D2 [515 AA] TRINITY\_DN46460\_c4\_g2\_i1|m.27900

MFLSLIINFIFNHILVTLIVLIILICVYFSNYFRICYVSKINGPRAYPIIGNSTLFRGTLEEATKVFFQL  
SNEYAPITRFWIGPVPLVIVMDPKIIEILYNQNALEKAWFMKLIMKCVLGNTILISEVPKWKRNR  
NIINQGFTLSILKSIFYKIFEGNIDTLSDILDNELNNERFFDIYGILSKTTLEAVCASSMRLDMKFQQD  
QSNSSYFEAIHSSMHMMSARLMNPLKLPNIFYQFTQDYKKLMGYKNEVYAIARDAISTKRKEQIT  
MDDTLIDFKSENNNEIKKPLLDYLIDFTKSNPDTDEEMADEINLTIIAAYETTARTVSMVLLILAL  
YKDMQNKVCEELFQMLGESNENKINFDDLKLYMEMVIKEALRLFPAPLIARQLTEDVTMGN  
YTIPKGTNIGIPIFALHRNEAYWEEPLKFDPERFTFENIKKQNPYAFIPFSAGPRNCLGVRYAWIFM  
KLALSRLLSKYEFHTNIKDLSEIKFEFEISLKIINGYPIRITPRQR

>ON646335 CYP4C163 [501 AA] TRINITY\_DN46558\_c1\_g1\_i2|m.28640

MFCMYAVLFLIAAIIILLWHKNKNDRTVKLIEQFPGPKKLPIVGTSWTLLGVPVNKLFSYISSEYDR  
YYPGPYRTWLGPPTAINIYKPEHIECIVNNQKHITKGLTYNFLHPWLGGQGLLTSSGEKWFKHRRMI  
TPAFHFKILDQFVEVFFFEKCDIMTKRLERHSDGKYFDIYPYITRCALDIICETAMGVPINAQVDQDS  
EYVTALYEVSDLTMKRSVLPWLQPDIIWNNVADGKRYQCLAILHGFTNSVIKGRRESRKSNNVAE  
TVSKDDDIGSKKRMAFLDVLLEAQEKDPTLSDTDIREEVDTFMFEGHDTTTAAICWSLFLMLGLHP  
EVQEKAYQEIQQIFQGSNRSLTKQDLLEMKYLEMVIKEALRLFPSVPIIGRVLKEDQEIDGKLVPE  
TVIFVNIHKSQRDPAHFNNPNEFNPDNFFLENSSKRHPYAYMPFSAGPRNCIGQKFALLEEKTIISTI  
LRNFKLKSMMQKMHEVNLVGSLVLRPEQGAIVSLEKRQ

>ON646336 CYP4C163 [372 AA] TRINITY\_DN46558\_c1\_g1\_i5|m.28641

MFCMYAVLFLIAAIFVLWHKNKNDRTVKLIEQFPGPKKLPIVGTSWTLLGVPVNKLFSYISSEYDR  
YYPGPYRTWLGPPTAINIYKPEHIECIVNNQKHITKGLTYNFLHPWLGGQGLLTSSGEKWFKHRRMI  
TPAFHFKILDQFVEVFFFEKCDIMTKRLERHSDGKYFDIYPYITRCALDIICETAMGVPINAQVDQDS  
EYVTALYEVSDLTMKRSVLPWLQPDIIWNNVADVRYQCLAILHGFTNSVIKGRRESRKSNNVAE  
TVSKDDDIGSKKRMAFLDVLLEAQEKDPTLSDTDIREEVDTFMFEGHDTTTAAICWSLFLMLGLHP  
EVQEKAYQEIQQIFQGSNRSCPSNIKVSTSSRISVSLNVGSFS

>ON646337 CYP4C163 [396 AA] TRINITY\_DN46558\_c1\_g1\_i6|m.28643

MFCMYAVLFLIAAIIILLWHKNKNDRTVKLIEQFPGPKKLPIVGTSWTLLGVPVNKLFSYISSEYDR  
YYPGPYRTWLGPPTAINIYKPEHIECIVNNQKHITKGLTYNFLHPWLGGQGLLTSSGEKWFKHRRMI  
TPAFHFKILDQFVEVFFFEKCDIMTKRLERHSDGKYFDIYPYITRCALDIICETAMGVPINAQVDQDS  
EYVTALYEVSDLTMKRSVLPWLQPDIIWNNVADGKRYQCLAILHGFTNSVIKGRRESRKSNNVAE  
TVSKDDDIGSKKRMAFLDVLLEAQEKDPTLSDTDIREEVDTFMFEGHDTTTAAICWSLFLMLGLHP  
EVQEKAYQEIQQIFQGSNRSLTKQDLLEMKYLEMVIKEALRLFPSVPIIGRVLKEDQEIGKIYDNKT

>ON646338 CYP4C163 [501 AA] TRINITY\_DN46558\_c1\_g1\_i7|m.28644

MFCMYAVLFLIAAIFVLWHKNKNDRTVKLIEQFPGPQKLPIVGTSWTLLGVPVKNLFSYISSEYDR  
YYPGPYRTWLGPPTAINIYKPEHIECIVNNQKHITKGLTYNFLHPWLGGQLLTSSGEKWFKHRRMI  
TPAFHFKILDQFVEVFEKCDIMTKRLERHSDGKYFDIYPYITRCALDIICETAMGVPINAQVDQDS  
EYVTALYEVSDLTMKRSVLPWLQPDIIWNNVADGKRYQCLAILHGFTNSVIKGRRESRKSNSVAE  
TVSKDDDIGSKKRMAFLDVLLEAQEKDPTLSDTDIREEVDTFMFEGHDTTTAAICWSLFMLGLHP  
EVQEKAYQEIKQIFQGSNRSLTKQDLLEMKYLEMVIKEALRLFPSVPIIGRVLKEDQEIDGKLVPE  
TVIFVNIHKSQRDPAHFNNPNEFNPDNFLLENSSKRHPYAYMPFSAGPRNCIGQKFALLEEKTIISTI  
LRNFLKLSMQKMHEVNLVGSVLVRPEQGAIVSLEKRQ

>ON646339 CYP12AR1 [532 AA] TRINITY\_DN46620\_c3\_g1\_i1|m.28748

MNKKLVSFHEIPFKFQQLRNLTVDKNINNKLTTENKKYHDLEWNEALPFEFLPGPKPLPIIGNAWR  
FFPFIGNYYGKNILELHKQLHKEYGNIVILKGIMGRPPFVITFSPEDCEKIFRNEGTRPYRNGIGSLA  
YYQKVVRKNYKNNASLAVLQGDEWHKMRAQVNSALMQPRVVARYVNRIENVARDFILKIDFL  
LKNSKNTDELPPDFLNEIYRWSLETAGEISLDTRLGCLELNVSNSEVQQIIDA VNDMFDLIFELNI  
LPSMWRQISTPKYKKFVRTMDYLT SICRKYADRAQTKMLGSEHNNDTVPSVLEVLLKVDKVVAI  
MAVDILLAGVDTTGKTA AAVMYFLSINQEKQDKLREELIELMPDPNTPLTRQILDKMTYLRGCIK  
EAQRIASITPGQNRVLPKDITLSGYQIPKNT EVFTGNLLMCNL DENYPKSNQYIPERWLRNSAPELT  
AKTPHPFVFLPFGHGPRACIGRRFAFCELEVLIATVFRKYKFEW HDEM KFNSRLFYGVDSPLKFK  
LIPIY

>ON646340 CYP12AR1 [452 AA] TRINITY\_DN46620\_c3\_g1\_i2|m.28749

MYVCILHKEYGNIVILKGIMGRPPFVITFSPEDCEKIFRNEGTRPYRNGIGSLAYYQKVVRKNYKNN  
NASLAVLQGDEWHKMRAQVNSALMQPRVVARYVNRIENVARDFILKIDFL LKNSKNTDELPPDF  
LNEIYRWSLETAGEISLDTRLGCLELNVSNSEVQQIIDA VNDMFDLIFELNILPSMWRQISTPKYK  
KFVRTMDYLT SICRKYADRAQTKMLGSEHNNDTVPSVLEVLLKVDKVVAI MAVDILLAGVDTT  
GKTA AAVMYFLSINQEKQDKLREELIELMPDPNTPLTRQILDKMTYLRGCIKEAQRIASITPGQNR  
VLPKDITLSGYQIPKNT EVFTGNLLMCNL DENYPKSNQYIPERWLRNSAPELTAKTPHPFVFLPFG  
HGPRACIGRRFAFCELEVLIATVFRKYKFEW HDEM KFNSRLFYGVDSPLKFKLIPIY

>ON646341 CYP12AR1 [371 AA] TRINITY\_DN46620\_c3\_g1\_i3|m.28750

MRAQVNSALMQPRVVARYVNRIENVARDFILKIDFL LKNSKNTDELPPDFLNEIYRWSLETAGEIS  
LDTRLGCLELNVSNSEVQQIIDA VNDMFDLIFELNILPSMWRQISTPKYKKFVRTMDYLT SICRK  
YADRAQTKMLGSEHNNDTVPSVLEVLLKVDKVVAI MAVDILLAGVDTTGKTA AAVMYFLSINQ  
EKQDKLREELIELMPDPNTPLTRQILDKMTYLRGCIKEAQRIASITPGQNRVLPKDITLSGYQIPKNT  
EVFTGNLLMCNL DENYPKSNQYIPERWLRNSAPELTAKTPHPFVFLPFGHGPRACIGRRFAFCELE  
VLIATVFRKYKFEW HDEM KFNSRLFYGVDSPLKFKLIPIY

>ON646342 CYP12AR1 [520 AA] TRINITY\_DN48207\_c3\_g1\_i3|m.38225

MNKKLVSFHEIPFKFQQLRNLTVDKNINNKLTTENKKYHDLEWNEALPFEFLPGPKPLPIIGNAWR  
FFPFIGNYYGKNILELHKQLHKEYGNIVILKGIMGRPPFVITFSPEDCEKIFRNEGTRPYRNGIGSLA  
YYQKVVRKNYKNNASLAVLQGDEWHKMRAQVNSALMQPRVVARYVNRIENVARDFILKIDFL  
LKNSKNTDELPPDFLNEIYRWSLETAGEISLDTRLGCLELNVSNSEVQQIIDA VNDMFDLIFELNI  
LPSMWRQISTPKYKKFVRTMDYLT SICRKYADRAQTKMLGSEHNNDTVPSVLEVLLKVDKVVAI  
MAVDILLAGVDTTGKTA AAVMYFLSINQEKQDKLREELIELMPDPNTPLTRQILDKMTYLRGCIK  
EAQRIASITPGQNRVLPKDITLSGYQIPKNT EVFTGNLLMCNL DENYPKSNQYIPERWLRNSAPELT  
AKTPHPFVFLPFGHGPRACIGRRFAFCELEVLIATVRCQYIRLPEVELYTEWAILINNG

>ON646343 CYP4418B2 [368 AA] TRINITY\_DN46696\_c0\_g1\_i1|m.28800

MWVDLLL FVALLIGIFTIFYTWN YDYWNKRRLPYVKPIFPFGSLKDVILFKKTFSSLLDDWYYKY  
KDYKYIGVYFGRHPVLFIRDAQLIKDVMVKHFHNFQDNNARINEKADPIAGNPNPMLKGGRWKS  
TRAHLTPGFTALKLKQMFPNMLSVSERLISYIQQNIDSSKNSIEAKDLSTNFTTEVFTLAALNMKSD  
SFENPNSQFKTIAGDLLAGSHLKL FITWTLTIVDPALAVLLRIRILSKKGEMYFRKAISDVLAYREQ  
NNLVINDFCNYLNNIHLKNSDFTRDDVVSNI VTIFLDGVETSSQIMRFLREVAAYPEVFKKLRNEI  
DTIKSKYDDKITFDGLQEMTYLDSCLFETLRIYSALLT

>ON646344 CYP4422A1 [409 AA] TRINITY\_DN46720\_c0\_g1\_i4|m.29972

MFLILSLVLVIYSLIYYYYFRHKFSYWKRRGVETYPARFPFGHLGEFYLNKKSYYIEFTQYYDQSKSE  
FCGIYQGIDPLLIVKNLEDIKYVLVKNFNCFMNRGVHTDFNSNVVSATLFRIEGDQWRNLRHKLTP  
AFTSGKLLKAMFETINQCCNGLDYALNKAMDPKTGEINVKMLAQRYTVDVISSVGFVGVEANCLND  
NYASPPFKLSQEILDRTALRTLLIKFQFFGPSYAKILYKFFSDRSKENQQSFFNMINSIVENRQKNKI  
MRKDFLQLLIELKNHGTIDSSNDSIDNPNVFDKKDSLNFEDMKTFVSQVFIFYFAGFDTSALTLT  
MMLYYLAENQDLQKRLRKDINDCLRKHNNKLTVDGVMEMEYLEMMLSETLLLNLNWASSILYY  
ILETNAPVLAALNVMF

>ON646345 CYP4422A1 [439 AA] TRINITY\_DN46720\_c0\_g1\_i16|m.29980

MFLILSLVLVIYSLIYYYYFRHKFSYWKRRGVETYPARFPFGHLGEFYLNKKSYYIEFTQYYDQSKSE  
FCGIYQGIDPLLIVKNLEDIKYVLVKNFNCFMNRGVHTDFNSNVVSATLFRIEGDQWRNLRHKLTP  
AFTSGKLLKAMFETINQCCNGLDYALNKAMDPKTGEINVKMLAQRYTVDVISSVGFVGVEANCLND  
NYASPPFKLSQEILDRTALRTLLIKFQFFGPSYAKILYKFFSDRSKENQQSFFNMINSIVENRQKNKI  
MRKDFLQLLIELKNHGTIDSSNDSIDNPNVFDKKDSLNFEDMKTFVSQVFIFYFAGFDTSALTLT  
MMLYYLAENQDLQKRLRKDINDCLRKHNNKLTVDGVMEMEYLEMMLSETLRLRPVLGHLFRVC  
NKECYLPSSNLKVDVGTNICIPVYNIQRDEKYFPNPNKFDPERFS

>ON646346 CYP4422A2 [379 AA] TRINITY\_DN46720\_c0\_g1\_i7|m.29973

MFETINQCGNGLEYALNKAMDPKTGDINVQMLVQRYTVDVISSVGFVGVEANSLKDNYASPIFNLS  
QEIVVRKSLHSFLIKLAFFGPSYAKILYNFFSEGSKETRQSFLSMVNNIVESREKNKITRKDFLQLLI  
ELKNHGKIDSSNDSLDNADVFDKKDSLNFESMKTFSQVFVIFYFAGFDTSALTLTMMMLYYLAE  
NQNIQKRLRKEIDECLKKHNNELTYDGVMEMEYLEMVLSETLRLRPVLGHLVRVCNKECYLPSS  
NLKIDVGTIGIPIYNIQRDEKYFPNPNKFDPERFSKENISKIPNFAYLPFGDGPRFCIGLRLGKLQTK  
MGLISILRNHTVHLSKSKISNYAPENVILKPKEPVILSFQKFISTDSE

>ON646347 CYP4422A2 [521 AA] TRINITY\_DN46720\_c0\_g1\_i8|m.29974

MFLILSLVLVIYSLIYYYYFRHKFSYWKRRGVETYPARFPFGHLGEFYLNKKSYYIEFTQYYDQSKSE  
FCGIYQGIDPLLIVKNLEDIKYVLVKNFNCFMNRGIHTDVNNNFLSEHLFRIEDEQWKNLRNKLSP  
AFTSGKLLKAMFETINQCGNGLEYALNKAMDPKTGDINVQMLVQRYTVDVISSVGFVGVEANSLKD  
NYASPIFNLSQEIVVRKSLHSFLIKLAFFGPSYAKILYNFFSEGSKETRQSFLSMVNNIVESREKNKIT  
RKDFLQLLIELKNHGKIDSSNDSLDNADVFDKKDSLNFESMKTFSQVFVIFYFAGFDTSALTLTMM  
MLYYLAENQNIQKRLRKEIDECLKKHNNELTYDGVMEMEYLEMVLSETLRLRPVLGHLVRVCN  
KECYLPSSNLKIDVGTNICIPVYNIQRDEKYFPNPNKFDPERFSKENILKIPNFAYLPFGDGPRFCIGL  
RLGKLQTKMGLISILRNHTVHLSKSKISNYAPENVILKPKEPVILSFQKFISTDSE

>ON646348 CYP4422A2 [521 AA] TRINITY\_DN46720\_c0\_g1\_i14|m.29979

MFLILSLVLVIYSLIYYYYFRHKFSYWKRRGVETYPARFPFGHLGEFYLNKKSYYIEFTQYYDQSKSE  
FCGIYQGIDPLLIVKNLEDIKYVLVKNFNCFMNRGIHTDVNNNFLSEHLFRIEDEQWKNLRNKLSP  
AFTSGKLLKAMFETINQCGNGLEYALNKAMDPKTGDINVQMLVQRYTVDVISSVGFVGVEANSLKD  
NYASPIFNLSQEIVVRKSLHSFLIKLAFFGPSYAKILYNFFSEGSKETRQSFLSMVNNIVESREKNKIT  
RKDFLQLLIELKNHGKIDSSNDSLDNADVFDKKDSLNFESMKTFSQVFVIFYFAGFDTSALTLTMM  
MLYYLAENQNIQKRLRKEIDECLKKHNNELTYDGVMEMEYLEMVLSETLRLRPVLGHLVRVCN  
KECYLPSSNLKIDVGTNICIPVYNIQRDEKYFPNPNKFDPERFSKENILKIPNFAYLPFGDGPRFCIGL  
RLGKLQTKMGLIAILRNHTVHLSKDKISNYAPEYVILKPKEHVILSFRKYISTEKE

>ON646349 CYP4416B2 [504 AA] TRINITY\_DN46945\_c0\_g1\_i1|m.30581

MFLIILVFLILFLSYFSNYLRVFYVSKLPGPTAYPIIGNALLILGTNEDALSKVLKLFKDYSPPFRA  
WLGVPVIVCTSNPDFVQRLLTGKYSMEKSFLMKYIGKEVVGNSIISEVPKWKHNRNIIAQGFTP  
LQSYFEIFLEKSLMLCDNLDVKLNDVKSFDIFQYLSQTSLDTICASTMGVNSNDENNKAIFYSAIE  
NVLHLSVERSRYFWNIPKFIYCWSKSYKKHNESMKTIQEFANNVILQKKNYCKSYNNLDICTDRS  
KNEFKKPLLEFLIDLQATNLDFTTEKDLGDEANLVIIAGYETSATALSSVLLNLAVYKDVQNKVYEE  
LFQVLGSDLNRTINFDDLPLKTYMEMVMKESMRLFPIAPFIIRELTDDIQLGDCLIPRGVSCAVSIY  
ALHCDEKIWENPLKFDPERFTPENSIGRHPYAYIPFSGGPRNCIGMRYAWMFMKTVLATLLSRYEF  
HTDLNTSEFKFEFAVTMKLIGGYQIQITPRKNDFLDHSR

>ON646350 CYP4416E1 [509 AA] TRINITY\_DN46945\_c0\_g3\_i2|m.30583

MLLEYIKNYLLVILLSLIVSLILCSYSKYLRIFYYTTLKPGPTALPIIGNILMLVGNHEEITTIVLNKV  
QEYSPIFRAWLGPVPLIFTVKPEYIQEILNHGLEKAWIMKQAGYQLSGDSIMSSKVS KWKRNRRIV  
VRGFSPILLKSYFKVFVEKNVILNIENLNKKLNDDKPFDFEYISKTTMDAVCGSTLG YDVNAQNSN  
SSYYNAVQNLFFLMFERIFHPWKLPDIYYKFTEDGKQSEKSRDVILGLASKIITERRKIQYENAMQ  
NHTLEIQDIKKNVFNKPLLDYLIDITENNQEFDNEQLRDEINIVILGGYETSANALSYVLLNLAAHK  
DIQERVCKELFEVLGDGDLNRPIEIDDLPKLKYMDMVLKESMRLYSTVPIIAREITKDIQMGDFFIPK  
GSTCVIPILSLHRDHNLWKDPLKFDPERFTPENMKGRHPYAYIPFGGGPRNCIGIRYAWMFMKTLL  
ATLLCRYEFHTDLNLNELKMQMEVSLKLVGGHQVRITSRIKN

>ON646351 CYP6YJ1 [516 AA] TRINITY\_DN47041\_c1\_g2\_i1|m.31304

MIKNITIIIEKYACVTLLVVTSRMFIPITLLLLLLILLAYYYFSYKFTYWKRKGVSFPVTIPSGNILQ  
ILVCRKSYTSVFTEIYK KINGAYAGIYFGLFPVLFVKDPEIHKDVLIKKFDHFQNRGVHFDEKHEPLS  
AHLFRIEGEKWKTMRRLTPAFSSGKLKWMTDIIFDCGNNLRSLNDVYDGDNINFSIICHKYATD  
VIASVGFGEANSKDDQSVFYHFASDIKSLNPLKKFVQQCVLFPPELLRLIPMRQQSKESSEVFFL  
KTIDETVKYREENNKTNRNDFMQLLINMKNQENEITMRELAQAQYVFYIAGLETSNHTLSYTLYYL  
AKYPEIQAKLLEEIDATFDTDEKFTYENINGMTYLEMVLLESRLRPTLSMLNRVCNKPYTIPNTNI  
TIDVGTKILISIIDLQTPKYFPNPDKFDPERFSPANKSKIPSYCYMPFGGPRKCIGERQGKFQTKIG  
LISILRDHSVRICSYTKEPSEWLPGALLTVPKDPHILKLVKRKKS

>ON646352 CYP9GK4 [350 AA] TRINITY\_DN47405\_c0\_g2\_i1|m.33522

RFTNDVIANATFGVKCNSFQDKNNEFYLMGRAAIKFKAWRIILLSLIPAVLNKVLKFTAIPYVCD  
YFRNLVKHTTTIRKLQNIIRKMDLHLLMEAQKSTLKYENYIEYKEFAAVDESINSYGKARTLDDE  
DVAAQAFIFFLTSFESTSTAMCFVAYELALNPDIQQRCYDEIHEILELTDGKLSYDAVQKIKYLD  
MVISETLRKWPPAVATDRVCTKSYTLNVDGKDIFLEKGTNIEIPIYGIHHPQFYFPNPDKFDPERFSD  
ENRHNIDPMTYLPFGVGPRNCIGSRFALMEIKVAMFHILKNFEIILTNTKSTVPPKLTSTSCLGIVGG  
FNVGLRPRPIDHTSTYLI

>ON646353 CYP9GK4 [364 AA] TRINITY\_DN47405\_c0\_g2\_i6|m.33525

EIKKLGDSKHIELELKDSFTRFTNDVIANATFGVKCNSFQDKNNEFYLMGRAAIKFKAWRIILL  
LIPAVLNKVLKFTAIPYVCDYFRNLVKHTTTIRKLQNIIRKMDLHLLMEAQKSTLKYENYIEYKEF  
AAVDESINSYGKARTLDDEDVAAQAFIFFLTSFESTSTAMCFVAYELALNPDIQQRCYDEIHEILEL  
TDGKLSYDAVQKIKYLD MVISETLRKWPPAVATDRVCTKSYTLNVDGKDIFLEKGTNIEIPIYGIH  
HDPQFYFPNPDKFDPERFSDENRHSIDPMTYLPFGVGPRNCIGSRFALMEV K VAMFHILKNFEIILT  
NTKSTVPPKLTSTSAMVIEGGFNVGLKPRLVI

>ON646354 CYP9GK4 [404 AA] TRINITY\_DN50479\_c1\_g2\_i2|m.50193

MFFILLCLLGVVLVFLYREKHYSYNYWENKGKISFKALWLTDKVIRLVFQRVSLAETILSYYN  
AVPNEKCVGFVAFNNATLIIRDTELKQITVKDFDYFTDHPKTFVVEGVDGLLDKNL FALDGD  
TWREMRATLSPAFTGAKIRGMFQV VNECGDQMAAFYLN EIKKLGDSKHIELELKDSFTRFTND  
VIANATFGVKCNSFQDKNNEFYLMGRAAIKFKAWRIILLSLIPAVLNKVLKFTAIPYVCDYFRNL  
VKHTTTIRKLQNIIRKMDLHLLMEAQKSTLKYENYIEYKEFAAVDESINSYGKARTLDDEDVAAQAFIF  
FLTSFESTSTAMCFVAYELALNPDIQQRCYDEIHEILELTDGKLSYDAVQKIKYLD MVISETLR  
KWPPAVATDRVCTK

>ON646355 CYP4416D1 [515 AA] TRINITY\_DN47476\_c1\_g3\_i1|m.33831

MILMIASSFTINYVLLVTLTVLIGLLTFVYFSNYFRICYFVLKIRGPRAYPIIGNGLLFRGSLEEMSKV  
VFETAIEYGPLTRLWMGPIPLMTNEPRIIIEILTNANALEKAWLMKVMTRTMVGNAMIISEVPQW  
KRMRSITRAFTTSILKPYSNIFVDKMDILIEILDKELNKENTFDISKILSKAALDSVYASSMGVNMN  
VQKGDSRFVDAMHRSCDLMIGRGLNPLKYPETIYRFTQDYKELMQCRDVVYSLTNK VISEKRNN  
YKNGINNNQKDLKAVNTNAFKKPLLDYLIDFTENNPDFTDEQLADEINFITLEAMDTTAKQLSWV  
LLIMAIHKDEQKKVYDELFEVLSNSNPDKIVFDDLSSLKYM MEMVIKEAMRLFPVAPLIGRELTKDI  
HFENYTI PKGTNIAIPIFSVHRNEDYWENPLKFDPERFSS ENIKKHPY AFLAFSAGPRNCIGMRYA  
WLFMKIALACLLSRYEFHTSIKDMSDIRYQLELSLNVIGGHQVRITPRQK

>ON646356 CYP6YH6 [454 AA] TRINITY\_DN47883\_c2\_g1\_i1|m.36192

MRLITSSLSFDLLTLLLIGIILFYNYLKS KYNW KERNVPYEEPNIIFGNFYDAFTFKRQITSFFHDQ  
YRKTNDKVFGLYVFQRPFLLLRDPELIKHVLVKDFNNFIPRSNSKSSNDPIGNKNLFS LKNVHHWR

FMRSKMSPFFSSGKMRNVFGLLDTIGDQLTEHIKKHLNKTIDIKDVSQKYTIDVIVSAAYGIEANSF  
TNEKAAPSSIGKVIFTYSLKRSVELISYFFAPLLVKLFNFKFFGDEATQFFRSVFWAAIKERELNYV  
KRPDLIETLIALKNKGTLSDPAVGDLGTVNNSKKLSSNKDTIKLEGDILVAQAAVFFAAGFETSSL  
AISFTLYFLSYNPEIQIKLRKEIQTIVVRNGGKFTYDCLQDMKFLDACIKETLRMYPTLGFLDREAI  
DTYTFPGTNITIDKGTAVVISLEGLHRDPQYFENPDVYDPERFNNKINIV

>ON646357 CYP6YH7 [421 AA] TRINITY\_DN47883\_c3\_g2\_i1|m.36193

KDFNNFIPRTSAPTYKDDPLGEYNLFSMKSTHDWRFIRSKLSPIFSSGKLRNMFPLVNENGENLNG  
YLKNHVFETLEGKSVQCQNYTTDAIVSTVMGLSVNSFKDEETEFDRISKGLFTVTLRRATELMFFFF  
VPFLSRLRLKVFSEMGSGFYRNLFWSAVKMRQDNNIKRPDLIDALITLKNYGTIEDADSKEQKK  
EVVSNPSQLKLDGDVLVAQIALFYAAGLNTSSAAMSFTCYSLSYNPEIQIKLRKEIQTVLARNGGK  
LTYESVFEMKYLDCCFKETLRLYPSLGYLDREALDITYTFPGTNLTIEKGTPTVIISLAGMQKDPQYF  
KNPDVYDPERFNDENKDKIPPYVFMFPGDGRNCIGARLGQLITKVGLINILKDYEVVTVASKPLL  
ELNPKAFFTEAKGGISLQFKPGTVYV

>ON646358 CYP6YH7 [380 AA] TRINITY\_DN47883\_c3\_g2\_i2|m.36198

KDFNNFIPRTSAPTYKDDPLGEYNLFSMKSTHDWRFIRSKLSPIFSSGKLRNMFPLVNENGENLNG  
YLKNHVFETLEGKSVQCQNYTTDAIVSTVMGLSVNSFKDEETEFDRISKGLFTVTLRRATELMFFFF  
VPFLSRLRLKVFSEMGSGFYRNLFWSAVKMRQDNNIKRPDLIDALITLKNYGTIEDADSKEQKK  
EVVSNPSQLKLDGDVLVAQIALFYAAGLNTSSAAMSFTCYSLSYNPEIQIKLRKEIQTVLARNGGK  
LTYESVFEMKYLDCCFKETLRLYPSLGYLDREALDITYTFPGTNLTIEKGTPTVIISLAGMQKDPQYF  
KNPDVYDPERFNDENKDKIPPYVFMFPGDGRNCIGELHKFVIIIHLSPLAI

>ON646359 CYP6YH8 [389 AA] TRINITY\_DN47883\_c3\_g5\_i3|m.36196

MALVTSSWFTDILTLIVTSLIVYYFLTSTYNYWKNKNIPYEKPTLIFGNFYNAVTFQQNITDYFAD  
QYRKTKEKFFGLYIFRRPYLLIRDPELAKHVLIKDFNNFVPRTTAPTHKDDPMGQYNLFSMKNNN  
DWRFIRSKLSPIFSSGKLRNTFPLINEIGENLNGYLKNHVFETLEGKSVCRKYTSDVIVSTVFGISTN  
SFTDEETEFELSKTVFTTLRRAYELMFFFFVPTVSRLFRLKVFSEEGTEFFRNIFWSAVKMRDEH  
NIKRPDLIDALITLKNYGTIEDPDNKENSKKEVVSNSQLKLDGDVLVAQIALFYAAGLDTSSNAMS  
FTCYSLSYNPEIQIKLRKEIQSVLARNGGQLTYDSLSEMKFLDCCIRGINTIQIMS

>ON646360 CYP4421A1 [498 AA] TRINITY\_DN47910\_c3\_g2\_i3|m.36888

MITIILLILIAISIRYYKENFNFDYWKIRNVKFLKPLPIFGNYLPAFLMQMSTGKLLKIHRRHYENEP  
YVGFIYFNKPYLLIKDPKIIQSILVKDFTKFNNRSTASVIENDFIGTYSLFALKDTEWKVLRSKVLPF  
FSTKQMKLMFELITDVGEHLNEEIKQIYNKKTNIFETKDTAGKFASDIIAACVYGIPPPNEFLQISKSI  
FEPSVIRNFELNSFFFMKIFASIFKFTFIGRKATNYLRMLFWNIINTREMEVQHNSKMKQDNFLNFI  
ELRKNKEISLTHDKLVAQAIFFTAGIEGPATAISQGLYHIALNSNIQRRRLKEIKQALADNNNELTF  
ENIKELPYLDACVRESFRMAIALPFLDRQASEDYKVPGTDLIEKGGMGIFISLYGMHYDPKYFPNPN  
KFDPERFLTNSKLNQFAYLPFGAGPRNCIGARFANIQVKIGLINVLKDFQVEAAKKIDEPFKAHP  
RGFFYTLANGYDLRFKDDDDIND

>ON646361 CYP4421A1 [446 AA] TRINITY\_DN47910\_c3\_g3\_i5|m.36892

MITIILLILIAISIRYYKENFNFDYWKIRNVKFLKPLPIFGNYLPAFLMQMSTGKLLKIHRRHYENEP  
YVGFIYFNKPYLLIKDPKIIQSILVKDFTKFNNRSTASVIENDFIGTYSLFALKDTEWKVLRSKVLPF  
FSTKQMKLMFELITDVGEHLNEEIKQIYNKKTNIFETKDTAGKFASDIIAACVYGIPPPNEFLQISKSI  
FEPSVIRNFELNSFFFMKIFASIFKFTFIGRKATNYLRMLFWNIINTREMEVQHNSKMKQDNFLNFI  
ELRKNKEISLTHDKLVAQAIFFTAGIEGPATAISQGLYHIALNSNIQRRRLKEIKQALADNNNELTF  
ENIKELPYLDACVRESFRMAIALPFLDRQASEDYKVPGTDLIEKGGMGIFISLYGMHYDPKYFPNPN  
KFDPERFLTNSKLNQFAYLPFGAGPRNCIGKYIICK

>ON646362 CYP4XF3 [470 AA] TRINITY\_DN48043\_c3\_g2\_i1|m.37118

MDDDAMNIKQQEQQNDKQTTTTILINNNHEEEVYTTINNNNNNTTTTISDNEQQQQPQQSINRN  
TWSRTSLRRSPIHNNNGGGTGSGSIKRWGSFRTTNKRQLGSNALASELYRSSSFNCTSGSGGNVTT  
RTTNCNLDDRMSTTSKDDLYGCSSMTTTYSSMSDHDQDIIDHGSLLLEDDVLDLNLHKVEQLQQQV  
NILTSTTIEQQQHNNNNINNNNNNNIIDDNSNVCLGSKKRIFLDLLQSTHLSGEPLTDKEIID  
EVTNFMFAGHDTTSVQLSLLMYLLCEHPEIQNELYKEQCAILTDINGDPSFKQIQEMNYLERTIKES  
QRILPCVISFSRKMTADIQLKTNNLLLPGGCTASIFVYDVHHPKIYENPEKFDPRFLPENIRGRHP

YAYIPFSAGPRNCLGQKFALLEMKTVMSNIIRNFKILPAYEDNGDKFKPIFRRYMLLTSLNGIQIRL  
ESRR

>ON646363 CYP6YK1 [499 AA] TRINITY\_DN48154\_c0\_g1\_i1|m.37978

MIIFLSILLILISILYYLMSNYDYFEKKNVDPYDKPVLLFGNIRDRLQLQVCLHDFMQYYMKYKN  
NHPICGVYEGRNPRYLVLDFNLVKDIFIRDFDHFTRSLFNFQADILKDLLMSSGPIWKPTRAK  
LTPAFSSGKLKAMDVLQRCGEQMSQHLLERKNPDEELEMKQFFGLFTLDVISNCAFGIESNPWKE  
TDPELITAFRNFDSTTLTRMRLASLVLMPHYFRRFVTVWIFNKKTAIFYANIIRNTREYRLKNN  
QRRNDFLQLLDISAQEEEEKPEHRLMDVDHVISQSILFMIAGFETSSTLLGFAAYELALNPEVQNT  
LRAEIKSVLEKHNNVCNYDAVQDMHYLEMVLLLETLRKHSPVARIDRCCVKEYKIRGTDIVMEKG  
MNVSVPVVGFHYDPTYFPNPEKFDPLRFQENRNPDGFLSFGIGPRNCIGKRFALISTKFAMVYLIK  
DFELKATEKTEVPYTKRKIGILLYPQNGLHVKISKLE

>ON646364 CYP6YK1 [374 AA] TRINITY\_DN48154\_c0\_g1\_i3|m.37980

MIIFLSILLILISILYYLMSNYDYFEKKNVDPYDKPVLLFGNIRDRLQLQVCLHDFMQYYMKYKN  
NHPICGVYEGRNPRYLVLDFNLVKDIFIRDFDHFTRSLFNFQADILKDLLMSSGPIWKPTRAK  
LTPAFSSGKLKAMDVLQRCGEQMSQHLLERKNPDEELEMKQFFGLFTLDVISNCAFGIESNPWKE  
TDPELITAFRNFDSTTLTRMRLASLVLMPHYFRRFVTVWIFNKKTAIFYANIIRNTREYRLKNN  
QRRNDFLQLLDISAQEEEEKPEHRLMDVDHVISQSILFMIAGFETSSTLLGFAAYELALNPEVQNT  
LRAEIKSVLEKHNNVCNYDAVQDMHYLELHHNYKHCVFLILI

>ON646365 CYP4418A1 [509 AA] TRINITY\_DN48169\_c1\_g1\_i10|m.38105

MFFDILLILITITLCFVIFYTWNIDYWKRRIPYESPIFPFGSIKDALLLRKPLGSIHELYYKYKDYK  
YFGIFFGRHPVLFIRDPELFBKMTVKNFNDFQDNTASMSEKSDILGALNPFILKGERWKISRTHITP  
AFTSLKIKQNMYPNMVDVSRERLKMVITKNLDFNSNGIKIQNLARDFASEIFTLGLAIKTDAFEDS  
KNPFKIIAHEMFETESFTGILKFILMIVDPAVSLLLRTALMSKTAVEYFRKVIRDVRLQRKINNINTN  
DYFSYLDKLQIDNADFSEDDLASHIVTLFIDGVETTASTIKLTMAEIAANPRVFVKLREEIDRIMVK  
YDNKLTIDALRDMTYLDHCISEALRLHPLFMFFMRNCTAGSFQFPYKDGVNVDVKIDKGFSVL  
LPVYALQHDENLHANPETFYPERFSEDETKVQSKANYFGFGDGPRICLGMKYAQLVTKIGIWAMI  
SNFDIVLNEKSKYPIKNAGASFVFPPEDEPLNIFYKRGEIYSL

>ON646366 CYP4418A1 [366 AA] TRINITY\_DN48169\_c1\_g1\_i9|m.38103

MFFDILLILITITLCFVIFYTWNIDYWKRRIPYESPIFPFGSIKDALLLRKPLGSIHELYYKYKDYK  
YFGIFFGRHPVLFIRDPELFBKMTVKNFNDFQDNTASMSEKSDILGALNPFILKGERWKISRTHITP  
AFTSLKIKQNMYPNMVDVSRERLKMVITKNLDFNSNGIKIQNLARDFASEIFTLGLAIKTDAFEDS  
KNPFKIIAHEMFETESFTGILKFILMIVDPAVSLLLRTALMSKTAVEYFRKVIRDVRLQRKINNINTN  
DYFSYLDKLQIDNADFSEDDLASHIVTLFIDGVETTASTIKLTMAEIAANPRVFVKLREEIDRIMVK  
YDNKLTIDALRDMTYLDHCISGILLFFHI

>ON646367 CYP4418A1 [366 AA] TRINITY\_DN48169\_c1\_g1\_i13|m.38111

MFFDILLILITITLCFVIFYTWNIDYWKRRIPYESPIFPFGSIKDALLLRKPLGSIHELYYKYKDYK  
YFGIFFGRHPVLFIRDPELFBKMTVKNFNDFQDNTASMSEKSDILGALNPFILKGERWKISRTHITP  
FTSLKIKQNMYPNMVDVSRERLKMVITKNLDFNSNGIKIQNLARDFASEIFTLGLAIKTDAFEDSK  
NPFKIIAHEMFETESFTGILKFILMIVDPAVSLLLRTALMSKTAVEYFRKVIRDVRLQRKINNINTND  
YFSYLDKLQIDNADFSEDDLASHIVTLFIDGVETTASTIKLTMAEIAANPRVFVKLREEIDRIMVKY  
DNKLTIDALRDMTYLDHCISGILLFFHI

>ON646368 CYP4418A1 [509 AA] TRINITY\_DN48169\_c1\_g1\_i17|m.38118

MFFDILLILITITLCFVIFYTWNIDYWKRRIPYESPIFPFGSIKDALLLRKPLGSIHELYYKYKDYK  
YFGIFFGRHPVLFIRDPELFBKMTVKNFNDFQDNTASMSEKSDILGALNPFILKGERWKISRTHITP  
AFTSLKIKQNMYPNMVDVSRERLKMVITKNLDFNSNGIKIQNLARDFASEIFTLGLAIKTDAFEDS  
KNPFKIIAHEMFETESFTGILKFILMIVDPAVSLLLRTALMSKTAVEYFRKVIRDVRLQRKINNINTN  
DYFSYLDKLQIDNADFSEDDLASHIVTLFIDGVETTASTIKLTMAEIAANPRVFVKLREEIDRIMVK  
YDNKLTIDALRDMTYLDHCISEALRLHPLFMFFMRNCTAGSFQFPYKDGVNVDVKIDKGFSVL  
LPVYALQHDENLHANPETFYPERFSEDETKVQSKAIYYGFGDGPRICLGMKYAQLVTKIGIWAMI  
SNFDIVLNEKSKYPIKNAGPSFIFVPEDEPLNIFYKRGEIYSR

>ON646369 CYP4418A1 [509 AA] TRINITY\_DN48169\_c1\_g1\_i18|m.38120  
MFFDILLILITITLCFVIFYTWNVDYWKRRIPYESPFPFGSIKDALLRKPLGSIHELYYKYKDYK  
YFGIFFGRHPILFIRDPELFKMVTVKNFNDFQDNTASMSEKSDILGALNPFILKGERWKISRTHITPA  
FTSLKIKQNMYPNMVDVSRCLKMYITKNLDFNSNGIKIQNLARDFASEIFTLCGLAIKTDAFEDSK  
NPFKIIAHEMFETESFTGILKFILMIVDPAVSLLLRTALMSKTAVEYFRKVIRDVRLQRKINNINTND  
YFSYLDKLQIDNADFSEDDLASHIVTLFIDGVETTASTIKLTMAEIAANPRVFKKLREEIDRIMVKY  
DNKLTYPDALRDMTYLDHCISEALRLHPLFMFFMRNCTAGSFQFPPYKDGVNRDVKIDKGFSVLLP  
VYALQHNDENLHANPETFYPERFSEDETKVQSKAIYYGFGDGPRICLGMKYAQLVTKIGIWAMISN  
FDIVLNEKSKYPIKNAGPSFIFVPEDEPLLNIFYKRGEIYSR

>ON646370 CYP4418A1 [419 AA] TRINITY\_DN48169\_c1\_g1\_i22|m.38125  
MVTVKNFNDFQDNTASMSEKSDILGALNPFILKGERWKISRTHITPAFTSLKIKQNMYPNMVDVS  
ERLKMYYITKNLDFNSNGIKIQNLARDFASEIFTLCGLAIKTDAFEDSKNPFKIIAHEMFETESFTGIL  
KFILMIVDPAVSLLLRTALMSKTAVEYFRKVIRDVRLQRKINNINTNDYFSYLDKLQIDNADFSED  
DLASHIVTLFIDGVETTASTIKLTMAEIAANPRVFKKLREEIDRIMVKYDNKLTYPDALRDMTYLDH  
CISEALRLHPLFMFFMRNCTAGSFQFPPYKDGVNRDVKIDKGFSVLLPVYALQHNDENLHANPETF  
YPERFSEDETKVQSKAIYYGFGDGPRICLGMKYAQLVTKIGIWAMISNFDIVLNEKSKYPIKNAGP  
SFIFVPEDEPLLNIFYKRGEIYSR

>ON646371 CYP4XK1 [519 AA] TRINITY\_DN48411\_c1\_g2\_i4|m.39396  
MILHLEILILLASAIHAIYSYNNVRKHLNGFYHKAELIPGPQGHFLLGSIREIVGTDGGIYNWLQAR  
KKYGPVLKFWALDSLHVMLADPKDVELILKSQKTLTKSYGYNFMRPLMGEGLVTSAGEHWREH  
RKIITPTFHFNILEKFVETFNENAEILIKRLSDVQKENPTLDIHTFTLCALDIICETAMGTKINAQQS  
GGLNDYVQAVNLAAVMVHRYYNLLHRFRFISKFTPLGKQYERCLQLLLNRTEIIRTRKAELKR  
EKENKSVEVKKSEEDVGRKRRMAFLDLLLQTTHTNGSPLSDTEIRDEVNTFMVAGHETTSIGTST  
CLYLLSINPEVQEKVVEELNDIFGNDTRAPSYEDLQKLSYLERTIKESQRLMPSIAEFQRYIKEDFPI  
NNYVIPGGSTIGVMVYAMHIDPEIFPDPMPKFDPRFLPENSRRNHPFAYIPFSGGYRNCIGQKFAM  
LEMKA VISSVLRNFKIEAAIDEKTGKVFKPIIEERVTTGSKNGIYVKLLPRQKS

>ON646372 CYP4XF1 [511 AA] TRINITY\_DN48411\_c1\_g3\_i5|m.39402  
MIEIIIGALVAIVVALYVYFELPLKRIKRLTSGIPGPKGLPIVGILFDVRKEKAGTFGFLWNNTQKYG  
PIFKIPSVGRLAINMTNPEDIEVLLKNNEILDKPYSTTKFFKPWLGNGLVFSAGPYWKQQRKLITPT  
FHFNILEKFFEVEFNEQGDILIKLLKEKADGKTNDIFPYMQSFALDVICETAMGTKIHAQTSARSAY  
VLAVQDMERIIVERFISVIQQIDFLFPFTENGQTQRKALQILKESTD KLIRKRRDDLIKESENKSDEN  
QDDSFGTKKSLAFLDLMLQARNMDGTPLTNEQISDEVSTFTFAGHDTTSTQLAFLFYLLSKNPHIQ  
EEIYKEQCDILMGEKRDPTFQEVQEMHYLERTIKEAQRLPSVPLFSRQVTKDLQLKTNNYVAPE  
GSILTVFTFGLHRNPNIYPDPEKFDPRFLPENLRERNPYSFVPFSAGPRNCIGQKFAMLEMTSSS  
KILRNFKILPAFEADGTPYEPDLRAYIVLTA VNGIQVRLVSRT

>ON646373 CYP4XF1 [405 AA] TRINITY\_DN50017\_c0\_g1\_i2|m.47968  
MIEIIIGALVAIVVALYVYFELPLKRIKRLTSGIPGPKGLPIVGILFDVRKEKAGTFGFLWNNTQKYG  
PIFKIPSVGRLAINMTNPEDIEVLLKNNEILDKPYSTTKFFKPWLGNGLVFSAGPYWKQQRKLITPT  
FHFNILEKFFEVEFNEQGDILIKLLKEKADGKTNDIFPYMQSFALDVICETAMGTKIHAQTSARSAY  
VLAVQDMERIIVERFISVIQQIDFLFPFTENGQTQRKALQILKESTD KLIRKRRDDLIKESENKSDEN  
QDDSFGTKKRLAFLDLMLQARNMDGTPLTNEQISDEVSTFTFAGHDTTSTQLAFLFYLLSKNPHIQ  
EEIYKEQCDILMGEKRDPTFQEVQEMHYLERTIKEAQRLPSVPLFSRQVTKDLQLKTSNYQIRITI  
QR

>ON646374 CYP4XF2 [367 AA] TRINITY\_DN48411\_c1\_g3\_i6|m.39403  
IEIIIGALVAIVVALYVYFELPLKRIKRLTSGIPGPKGLPIVGILFDVRKEKAGTFGFLWNNTQKYGPI  
FKIPSVGRLAINMTNPEDIEVLLKNNEILDKPYSTTKFFKPWLGNGLVFSAGPYWKQQRKLITPTFH  
FNILEKFFEVEFNEQGDILIKLLKEKADGKTNDIFPYMQSFALDVICETAMGTKVHAQTKPRSAYVL  
AVHNMARIIVERVLSAIQQIDFLFAFTENGRTQRKALKVLKESTD KLIRKRRNDLIKESENKSNESQ  
ADTVGTTKRLAFLDLMLHARNMDGTPLTNEQISDEVSTFTAAGHDTTATQLALLFYLLSKNQHIQ  
EEIYKEQCDILMGENRDPTFQEVQEMHYLERT

>ON646375 CYP4XFfragment1 [353 AA] TRINITY\_DN48411\_c1\_g3\_i15|m.39409

MIEIFIGLVGVILVVLRLRLEPLRRIKKLTSTIPGPKGLPLVGILFDITKDKDALGYLWKCTQTYGH  
IFKIPIVGR LAINMSNPEDIEVLLKNEILEKPYTTAKFFRPWLGNGLLSRGSYWKHQKRLITPTFH  
FNILEKFYEVFNEQGQILIEILKEKADGKTNIDIFPYMQSFALDVICETAMGTVHAQTKPRSAYVL  
AVHNMARIIVERVLSAIQQIDFLFAFTENGRTQRKALKVLKESTDKLIRKRRNDLIKESENKSNESQ  
ADTVGTTKRLAFLDLMLHARNMDGTPLTNEQISDEVSTFTAAGHDTTATQLALLFYLLSKNQHIQ  
EEIYKEQCDILMGEKQES

>ON646376 CYP12AS1 [518 AA] TRINITY\_DN48442\_c4\_g1\_i3|m.39562

MLCSRFKITPNINKNYNLRCLLSTTNVAVVWDNAQPFETLPGPKPLPILGNAPRFLPPFGEYSKGN  
FLQIYQQQLQKQYGNIMVLRGLPGREPIVVITYSVNDIETMYRNEGPRPYRPGLDLRYRKHVRND  
VHKILGLALSQGGDDWDMRSKVNPMVMKTQSIRRYTKTVSSIADDLIKKIDILLSKSELPPDDL  
LNELFRWSLETVCAIALDTRLGCLDPNMSHDSEAQK MIDASVEMFECIYELDILPSVWKVSTPTL  
KKSIVNDFITSYVMKHLDAAEERMKNKPSNSDHEPSILERLIVIDKNVASAMVNDAMIAGIETTS  
KTVATVMYFLATNPNAQDKLREEINTIWPDSSTDITSKQIDQMLYLRACIKEAQRIAPVTVGTVRK  
LDVDVVLSGYQIPKGTDILSPNIVLCLSDKHFPQPEKYLPERWLRSSPSELSARNTNMFVYLPFGFG  
PRTCIGKRLATHEVEVLIAKLFKKYKFQWNYGPMRYTTKLLYEVAADPLRFELHPV

>ON646377 CYP18A1 [533 AA] TRINITY\_DN48592\_c0\_g1\_i2|m.39903

MFLYTIQYFLNRLWK FENDTFSMLAVFLLALCVVRFIQFYMELKALPPGPWGVPIGLLPTLSGIR  
APYLHYLELKQKYGPLFSMKVGSQ LHVIMTDYKLIRD TFRKDEFSGRPQGPFHDLLSGYGIINSEG  
KLWKDQRRFLHNRFRNFGVTYLGSGKNQIEKRIMGEVVEFLSVLKSFE GAPTDPSPILSVCISNVIC  
EMMMSVRFTHNDPKFLRFMGLTQEGQLWGSMNYATCIPVLQYFPKFRVILKKLGENRDEM SAF  
FQEQL EHRRTFDPENIRDLIDTYLLEIEKAKENGTD SNLFEGRNHDRQIRQVIADLFTAGMETIKN  
TLQFAILYMIHHPESLRAVQDEL DQIVGRNRLPKLEDLPYLP TTESTLYEVMRISSIVPLGTEHSPIR  
DVTVNGYRIPQNT HVHPFLHAVHMDPNLWDEPERFNPSRFINSAGNCVKPEYFLPFGVGRRMCL  
GDVLARMELFLFFSSMLHTFNISVPEGEKLPSLKPNSGITLFPEAFKVCFKPRSLNTDTVHPRQEK N  
IGVH

>ON646378 CYP4XG1 [516 AA] TRINITY\_DN48583\_c1\_g1\_i1|m.40225

MIDNKLNDINKNDNSLSTYFLLKYTLLTIIVISVIKFYWDRRRLYICALKFSGPTALPLLGNALLFA  
VQPEDILSRIYEIVCKYSSPCRLWFGHKLMTHIYAPEDLEVVLSDTVNIKKDHTYSFIEPFLGQGLIS  
NSGSLWKTHRRLIPTFTSKTLRYYVESFNTHAKTLVEKLQPIAERKETVNIIDPLNLCTVDIVLSTIL  
GIEAGA QDHKIDEFVEHVELGYKMVAERMFKGWLHLDAIFRLSKCYRNTMKAQKVIHDFAKKQ  
LTTLKAEFNQKYQDGLIDEHNVRTTLEHLLINKKGDDFFTDVELRDETYTLFTASQDTVATECAF  
ILLMLAMHPEIQEKVYKEILEVSGETKDYYTEWETYPEFKYLEMVIKESLRLFPIGPTIMREVIQDI  
KLKNDIVIPKGAGVMVVMYRTHRLPEYWTDPEKFIPERFLPELCEKRHPFAYVPFSFGPRSCIAPR  
YAMAAMKTIVTHVIRSYKLTCEDKFEDLQLCSDISTRSRNGYKMKLELRK

>ON646379 CYP4XG1 [420 AA] TRINITY\_DN48583\_c1\_g1\_i3|m.40227

MTHIYAPEDLEVVLSDTVNIKKDHTYSFIEPFLGQGLISNSGSLWKTHRRLIPTFTSKTLRYYVESF  
NTHAKTLVEKLQPIAERKETVNIIDPLNLCTVDIVLSTILGIEAGA QDHKIDEFVEHVELGYKMVAE  
RMFKGWLHLDAIFRLSKCYRNTMKAQKVIHDFAKKQLTTLKAEFNQKYQDGLIDEHNVRTTLEH  
LLLINKKGDDFFTDVELRDETYTLFTASQDTVATECAFILLMLAMHPEIQEKVYKEILEVSGETKD  
YYTEWETYPEFKYLEMVIKESLRLFPIGPTIMREVIQDIKLKNDIVIPKGAGVMVVMYRTHRLPEY  
WTDPEKFIPERFLPELCEKRHPFAYVPFSFGPRSCIAPRYAMAAMKTIVTHVIRSYKLTCEDKFEDL  
QLCSDISTRSRNGYKMKLELRK

>ON646380 CYP4XG1 [506 AA] TRINITY\_DN48583\_c1\_g1\_i4|m.40228

MIDNKLNDINKNDNSLSTYFLLKYTLLTIIVISVIKFYWDRRRLYICALKFSGPTALPLLGNALLFA  
VQPEDILSRIYEIVCKYSSPCRLWFGHKLMTHIYAPEDLEVVLSDTVNIKKDHTYSFIEPFLGQGLIS  
NSGSLWKTHRRLIPTFTSKTLRYYVESFNTHAKTLVEKLQPIAERKETVNIIDPLNLCTVDIVLSTIL  
GIEAGA QDHKIDEFVEHVELGYKMVAERMFKGWLHLDAIFRLSKCYRNTMKAQKVIHDFAKKQ  
LTTLKAEFNQKYQDGLIDEHNVRTTLEHLLINKKGDDFFTDVELRDETYTLFTASQDTVATECAF  
ILLMLAMHPEIQEKVYKEILEVSGETKDYYTEWETYPEFKYLEMVIKESLRLFPIGPTIMREVIQDI

KLKNDIVIPKGAGVMVVMYRTHRLPEYWTDPEKFIPERFLPELCEKRHPFAYVPFSFGPRSCIGTLF  
LKNRMQKFYLIFYFYLLVFSSEICYGCYENNRNPRHQKL

>ON646381 CYP4C164partial [357 AA] TRINITY\_DN48799\_c1\_g2\_i1|m.41074

KADGAEFDLYPYITRCALDIICETAMGVKIDAQRHIEANLGDKPEALDSSDSEYVKAIYDFSDLAL  
RRGFVIWYHINFIWNNSSSGRRYNKCVEILHGFTNKVILERKEALKAKKPVPKEENEADSIGTKK  
RMAFLDLLLEASLDGHHLTTEEIREEVDTFMFEGHDTTAAICWSLFLGNHMDVQKQCHEELDS  
IFQDTRDITRQDLADMKYLEMVIKETLRMYPSPVPIISRELGEDIVLDGFTVPKKTFAVMHLHETH  
RNEAHFKNPNTFNPENFNKDNCAKRHPYAYIPFSAGLRNCIGQKFAILEEKTVLASILRKFRIESIES  
VEECKKV GALILRPLNGVQVFLHRRH

>ON646382 CYP9GN5 [512 AA] TRINITY\_DN48771\_c0\_g2\_i4|m.41099

MF AIIALIVILYLIHYAITNVYKYWESRGIPYYKPRNAYYDTYCTFLQKDNFSLEIAKAYNGFDPKQ  
VYGSFLLRTPQLMVKDPDILRNICVKDFEHFTNHVDIFFKDDLLLGKSLFALKDKKWRDMRTILSP  
IFTGSKLRGMVDLVSECSEQTMDYYAQLIKQKSDKTKVKVDILDATSRFTNDVIATSAFGIQVNSLA  
DKTNVFFETGQEVSKFPFWRVVAAPKFVKKIFNLSLFPSKIYEFFRNIVEESIRIRKTQNIVRYDLI  
HLLLEAKKEQINKINEKSDNDQKLELSKNLLDIDDITAQSFIFFIAGFINVALTISFAGYELAIQPEIQ  
DKLRKEIRELLQKNNGKLDYDILKKMKYLDMMVVTEVLRKYPPAGMLDRVCTKAYTIKTATESID  
LVPGM PINIPVMGLHYDPKYFPNPNKFDPERFNDENREKMN PYTYLPFGVGPRLCIASRFVLMEIK  
IFLVHLINSFEVIATEKCPIMEFETGTVLKPKHDEFGIAIKLIK

>ON646383 CYP9GN5 [512 AA] TRINITY\_DN48771\_c0\_g2\_i1|m.41097

MF AIIALIVILYLIHYAITNVYKYWESRGIPYYKPRNAYYDTYCTFLQKDNFSLEIAKAYNGFDPKQ  
VYGSFLLRTPQLMVKDPDILRNICVKDFEHFTNHVDIFFKDDLLLGKSLFALKDKKWRDMRTILSP  
IFTGSKLRGMVDLVSECSEQTMDYYAQLIKQKSDKTKVKVDILDATSRFTNDVIATSAFGIQVNSLA  
DKTNVFFETGQEVSKFPFWRVVAAPKFVKKIFNLSLFPSKIYEFFRNIVEESIRIRKTQNIVRYDLI  
HLLLEAKKEQINKINEKSDNDQKLELSKNLLDIDDITAQSFIFFIAGFINVALTISFAGYELAIQPEIQ  
DKLRKEIRELLQKNNGKLDYDILKKMKYLDMMVVTEVLRKYPPAGMLDRVCTKAYTIKTATESID  
LVPGM PINIPVMGLHYDPKYFPNPNKFDPERFNDENREKMN PYTYLPFGVGPRLCIASRFVLMEIK  
IFLVHLINSFEVIATEKCPIMEFETGTVLKPKHDEFGIAIKLIK

>ON646384 CYP9GN5 [458 AA] TRINITY\_DN48771\_c0\_g2\_i5|m.41100

MF AIIALIVILYLIHYAITNVYKYWESRGIPYYKPRNAYYDTYCTFLQKDNFSLEIAKAYNGFDPKQ  
VYGSFLLRTPQLMVKDPDILRNICVKDFEHFTNHVDIFFKDDLLLGKSLFALKDKKWRDMRTILSP  
IFTGSKLRGMVDLVSECSEQTMDYYAQLIKQKSDKTKVKVDILDATSRFTNDVIATSAFGIQVNSLA  
DKTNVFFETGQEVSKFPFWRVVAAPKFVKKIFNLSLFPSKIYEFFRNIVEESIRIRKTQNIVRYDLI  
HLLLEAKKEQINKINEKSDNDQKLELSKNLLDIDDITAQSFIFFIAGFINVALTISFAGYELAIQPEIQ  
DKLRKEIRELLQKNNGKLDYDILKKMKYLDMMVVTEVLRKYPPAGMLDRVCTKAYTIKTATESID  
LVPGM PINIPVMGLHYDPKYFPNPNKFDPERFNDENREKMN PYSYLPFGVGPRLCIG

>ON646385 CYP9GN5 [512 AA] TRINITY\_DN48771\_c0\_g1\_i1|m.41096

MF AIIALIVILYLIHYAITNVYKYWESRGIPYYKPRNAYYDTYCTFLQKDNFSLEIAKAYNGFDPKQ  
VYGSFLLRTPQLMVKDPDILRNICVKDFEHFTNHVDIFFKDDLLLGKSLFALKDKKWRDMRTILSP  
IFTGSKLRGMVDLVSECSEQTMDYYAQLIKQKSDKTKVKVDILDATSRFTNDVIATSAFGIQVNSLA  
DKTNVFFETGQEVSKFPFWRVVAAPKFVKKIFNLSLFPSKIYEFFRNIVEESIRIRKTQNIVRYDLI  
HLLLEAKKEQINKINEKSDNDQKLELSKNLLDIDDITAQSFIFFIAGFINVALTISFAGYELAIQPEIQ  
DKLRKEIRELLQKNNGKLDYDILKKMKYLDMMVVTEVLRKYPPAGMLDRVCTKAYTIKTATESID  
LVPGM PINIPVMGLHYDPKYFPNPNKFDPERFNDENREKMN PYTYLPFGVGPRLCIASRFVLMEIK  
IFLVHLINSFEVIATEKCPIMEFETGTVLKPKHDEFGIAIKLIK

>ON646386 CYP9GN5 [458 AA] TRINITY\_DN48771\_c0\_g2\_i3|m.41098

MF AIIALIVILYLIHYAITNVYKYWESRGIPYYKPRNAYYDTYCTFLQKDNFSLEIAKAYNGFDPKQ  
VYGSFLLRTPQLMVKDPDILRNICVKDFEHFTNHVDIFFKDDLLLGKSLFALKDKKWRDMRTILSP  
IFTGSKLRGMVDLVSECSEQTMDYYAQLIKQKSDKTKVKVDILDATSRFTNDVIATSAFGIQVNSLA  
DKTNVFFETGQEVSKFPFWRVVAAPKFVKKIFNLSLFPSKIYEFFRNIVEESIRIRKTQNIVRYDLI  
HLLLEAKKEQINKINEKSDNDQKLELSKNLLDIDDITAQSFIFFIAGFINVALTISFAGYELAIQPEIQ

DKLRKEIRELLQKNNGKLDYDILKKMKYLDMVVTEVLRKYPPAGMLDRVCTKAYTIKTATESID  
LVPGMPINIPVMGLHYDPKYFPNPNKFDPERFNDENREKMNPYSYLPFGVGPRLCIG

>ON646387 CYP9GK5 [522 AA] TRINITY\_DN48962\_c0\_g2\_i10|m.41746

MLVLSLFIILIAIIYFYFIRPLNYWKNLDVPPFIPGYPIVGNIWTSLKKQSFTDELNSLYNAFPNEKCV  
GMFSFGTAPALLIRDPELLKQITIKDFNYFTDHTKSFFKDGFDLIDRNLFSLSGNEWDRMRATLSP  
AFTGSKMRGLFNMMNDCSEQFVSYYSNKVKNKAKDSHLEVELKKSFTFRFTNDIIASAVFGVKCDS  
LNNEQNEFYLMGCKAAYFATWRILLSNFCPWILKFLNLGGVPIEECKYFKNLVYETKAVREREN  
IIRPDILHLLIQAQKGALKDDSVENKGFVGTESKTVGNIKKLDDDDIAAQAFLLGGFETTSILM  
CFTIFELALNPDIQERLLNEIQNTLSESNGEFSYDVVHKMKYLDMIVTETLRKWPPAPITDRVTTKN  
YKIQVGKKLITLEPGFPITVPIIGFHRDPQYYPNPEKFDPERFNDENKKNIKPLTFCPFAGAPRLCIGA  
RFAVMNAKIIIFHMIKNFEVILVKNSTVPPVLSSKSGNTILENGFHVGLKLRKL

>ON646388 CYP9GK5 [409 AA] TRINITY\_DN48962\_c0\_g2\_i4|m.41738

MLVLSLFIILIAIIYFYFIRPLNYWKNLDVPPFIPGYPIVGNIWTSLKKQSFTDELNSLYNAFPNEKCV  
GMFSFGTAPALLIRDPELLKQITIKDFNYFTDHTKSFFKDGFDLIDRNLFSLSGNEWDRMRATLSP  
AFTGSKMRGLFNMMNDCSEQFVSYYSNKVKNKAKDSHLEVELKKSFTFRFTNDIIASAVFGVKCDS  
LNNEQNEFYLMGCKAAYFATWRILLSNFCPWILKFLNLGGVPIEECKYFKNLVYETKAVREREN  
IIRPDILHLLIQAQKGALKDDSVENKGFVGTESKTVGNIKKLDDDDIAAQAFLLGGFETTSILM  
CFTIFELALNPDIQERLLNEIQNTLSESNGEFSYDVVHKMKYLDMIVTETLRKWPPAPITDRVTTKN  
YKIQVGNFSL

>ON646389 CYP9GK5 [386 AA] TRINITY\_DN48962\_c0\_g2\_i5|m.41740

MLVLSLFIILIAIIYFYFIRPLNYWKNLDVPPFIPGYPIVGNIWTSLKKQSFTDELNSLYNAFPNEKCV  
GMFSFGTAPALLIRDPELLKQITIKDFNYFTDHTKSFFKDGFDLIDRNLFSLSGNEWDRMRATLSP  
AFTGSKMRGLFNMMNDCSEQFVSYYSNKVKNKAKDSHLEVELKKSFTFRFTNDIIASAVFGVKCDS  
LNNEQNEFYLMGCKAAYFATWRILLSNFCPWILKFLNLGGVPIEECKYFKNLVYETKAVREREN  
IIRPDILHLLIQAQKGALKDDSVENKGFVGTESKTVGNIKKLDDDDIAAQAFLLGGFETTSILM  
CFTIFELALNPDIQERLLNEIQNTLSESNGEFSYDVVHKMKYLDMIVTGKPRKK

>ON646390 CYP9GK5 [522 AA] TRINITY\_DN48962\_c0\_g2\_i2|m.41737

MLVLSLFIILIAIIYFYFIRPLNYWKNLDVPPFIPGYPIVGNIWTSLKKQSFTDELNSLYNAFPNEKCV  
GMFSFGTAPALLIRDPELLKQITIKDFNYFTDHTKSFFKDGFDLIDRNLFSLSGNEWDRMRATLSP  
AFTGSKMRGLFNMMNDCSEQFVSYYSNKVKNKAKDSHLEVELKKSFTFRFTNDIIASAVFGVKCDS  
LNNEQNEFYLMGCKAAYFATWRILLSNFCPWILKFLNLGGVPIEECKYFKNLVYETKAVREREN  
IIRPDILHLLIQAQKGALKDDSVENKGFVGTESKTVGNIKKLDDDDIAAQAFLLGGFETTSILM  
CFTIFELALNPDIQERLLNEIQNTLSESNGEFSYDVVHKMKYLDMIVTETLRKWPPAPITDRVTTKN  
YKIQVGKKLITLEPGFPITVPIIGFHRDPQYYPNPEKFDPERFNDENKKNIKPLTFCPFAGAPRLCIGA  
RFAVMNAKIIIFHMIKNFEVILVKNSTVPPVLSSKSGNTILENGFHVGLKLRKL

>ON646391 CYP9GP3 [506 AA] TRINITY\_DN48929\_c0\_g1\_i3|m.42062

MFWLIVGILAVILLYKFHNYIVSPFSYWKNKGIDYHLLHDPYTDIFKFVTNTVNSFEEDLANYNGM  
PDKKVYGVQFRNPALMIKDPDLLKQVLIKDFDHFNRHNSNVLGEEDSVLTRNLFISKDKKWHNSR  
TILSPVFTANKMRIIFSLMASCQDQIVAYFNKEYEKQGNKGKPLEIEFKSTTARFTNDVIATTSFGL  
DSFKNPENEFIKTGRAIFDFSMIRFILLFKFPFIKIFNVKLMAPIVYEFFPKVIRETLKNRRENNIKRP  
DMIQLMMEAKESLEKNPVKDLVLEDDDDIISQAFVFFGAGFETVSVAMSFAMYELAIHPEIQKRLQ  
EECIENFKKGDGKITYELLQGMKYLDMVVSESFRKWPPATSLDRVCNKKYTLNVDDQEIIVIEPEM  
FIICPVLGIHRDPKYYPNPKFDPERFNDENKASIHPTMYMPFGAGPRICIASRFAIMEVKLFLCYIL  
ANFNLEPTEKTPIPLKIKMSGFTYTAKDGFWIGLKPREQ

>ON646392 CYP9GP2 [444 AA] TRINITY\_DN48929\_c0\_g1\_i4|m.42063

MFWLIVGILAVILLYKFHNYIVSPFSYWKNKGIDYHLLHDPYTDIFKFVTNTVNSFEEDLINYNAPK  
DKKVYGVQFRIPALLIKDPDLLKQVLIKDFDHFTHNSNLRREDDPILTKNLFISRDKKWHDRTRILS  
PVFTANKMRIIFSLMASCQDQIVAYFNKEYEKQGNKGKPLEIEFKSTTARFTNDVIATTSFGL  
KNPENEFIKTGRAIFDFSMIRFILLFKFPFIKIFNVKLMAPIVYEFFPKVIRETLKNRRENNIKRPDM  
QLMMEAKESLEKNPVKDLVLEDDDDIISQAFVFFGAGFETVSVAMSFAMYELAIHPEIQKRLQEECI

ENFKKGDGKITYELLQGMKYLDMVVSSEFRKWPPATALDRVCNKKYTLNVDDQEIVIEPEMLIN  
CPVLGIHRDPKYYPNPDKFDPERFNDENKPSIHPMTYMPFGA

>ON646393 CYP9GP2 [431 AA] TRINITY\_DN48929\_c0\_g2\_i4|m.42067

MFWLIVGILAVILLYKFHNYIVSPFSYWKNKGIDYHLLHDPYTDIFKFVTNTVNSFEEDLANYNMG  
PDKKVYGVQFRIPALLIKDPDLLKQVLKDFDHFTHNSNILREDDPILTKNLFISRDKKWHDRITIL  
SPVFTANKMRIIFSLMASCQDQIVAYFNKEYEKQGNKGPLEIEFKSTTARFTNDVIATTSFGLEIDSF  
KNPENEFIKTGRAIFDFSILRFILLHKFPTIAKIFNVKLMAPIVYDFFPKVIRDALKNRRENNIKRPDM  
IQLMMEAKESLEKNPVKDLVLEDDDIISQAFVFFGAGFETVSVAMSFAMYELAIHPEIQKRLQEEC  
IENFKKGDGKITYELLQGMKYLDMVVSSEFRKWPPATALDRVCNKKYTLNVNDQEIVIEPEMLIN  
CPVLGIHRDPKYYPNPDKFDPERFNDENK

>ON646394 CYP9GP2 [506 AA] TRINITY\_DN48929\_c0\_g1\_i5|m.42068

MFWLIVGILAVILLYKFHNYIVSPFSYWKNKGIDYHLLHDPYTDIFKFVTNTVNGFEEDWANYNG  
MPDKKVYGVQFRIPALLIKDPDLLKQVLKDFDHFTHNSNILREDDPILTKNLFISRDKKWHDRITIL  
ILSPVFTANKMRIIFSLMASCQDQIVAYFNKEYEKQGNKGPLEIEFKSTTARFTNDVIATTSFGLEID  
SFKNPENEFIKTGRAIFDFSILRFILLHKFPTIAKIFNVKLMAPIVYDFFPKVIRDALKNRRENNIKRP  
DMIQLMMEAKESLEKNPVKDLVLEDDDIISQAFVFFGAGFETVSVAMSFAMYELAIHPEIQKRLQ  
EECIENFKKGDGKITYELLQGMKYLDMVVSSEFRKWPPATSLDRVCNKKYTLNVDDQEIVIEPEM  
FIICPVLGIHRDPKYYPNPDKFDPERFNDENKASIHPMTYMPFGAGPRICIASRFAIMEVKLFLCYIL  
ANFNLEPTEKTPIPLKIKMSGFTYTAKDGFWIGLKPREQ

>ON646395 CYP9GP1 [367 AA] TRINITY\_DN48929\_c0\_g3\_i2|m.42065

MFWLIVSVLAVILLYKFHNYILSPFFYWKNKKIDYHLIRGPYADLLKFVTNTVNIFFEDLINYNAPK  
DKKVYGTVTFRRLPSLLIKDPELLKQILKDFDHFTHNATLLSEADPLSDNLFIADKKWHNTRITIL  
SPVFTANKMRITIDLMALCGEQMISYFKKEYEKQGNKGPLEIEFQSTTGLFSNDVIATTSFGIQCD  
FKAPENEFIKTGRAIFNFSMLRFMLLHLTPSIKMFVDVKIMPPIVYEFFPRVIKEALKNRRENKVRP  
DMIQLLMEAKESLEKNPVKDLALSDDIISQALVFFAAGFETVAATMTFAIYELTIHPEIQKRAQEE  
CVEAFKKGGGKLTYEAINEMKYMDMVVSGKF

>ON646396 CYP9GP1 [524 AA] TRINITY\_DN50686\_c2\_g1\_i1|m.51542

MFWLIVSVLAVILLYKFHNYILSPFFYWKNKKIDYHLIRGPYADLLKFVTNTVNIFFEDLINYNAPK  
DKKVYGTVTFRRLPSLLIKDPELLKQILKDFDHFTHNATLLSEADPLSDNLFIADKKWHNTRITIL  
SPVFTANKMRITIDLMALCGEQMISYFKKEYEKQGNKGPLEIEFQSTTGLFSNDVIATTSFGIQCD  
FKAPENEFIKTGRAIFNFSMLRFMLLHLTPSIKMFVDVKIMPPIVYEFFPRVIKEALKNRRENKVRP  
DMIQLLMEAKESLEKNPVKDLALSDDIISQALVFFAAGFETVAATMTFAIYELTIHPEIQKRAQEE  
CVEAFKKGGGKLTYEAINEMKYMDMVVSETLRKWPPGTNTDRVCNKKYSLKVDNQEIVIEPEM  
LITVPVLGIHRDPKYYPNPDKFDPERFNDENKSSIHPQTYMPFGAGPRICIASRFAIMEVKLFLCYIL  
ANFNLEVIEKTPIPLKLKMAGLTGYTAKDGFWIGLKPRQ

>ON646397 CYP9GP4 [378 AA] TRINITY\_DN48929\_c0\_g2\_i3|m.42066

MVSKRIGLIIMGCRIKKVYGVQFRNPALMIKDPDLLKQVLKDFDHFTHNSNVLGEEDSVLTRNL  
FISKDKKWHNSRTILSPVFTANKMRIIFSLMASCQDQIVAYFNKEYEKQGNKGPLEIEFKSTTARFT  
NDVIATTSFGLEIDSFKNPENEFIKTGRAIFDFSILRFILLHKFPTIAKIFNVKLMAPIVYDFFPKVIRD  
ALKNRRENNIKRPDMIQLMMEAKESLEKNPVKDLVLEDDDIISQAFVFFGAGFETVSVAMSFAMY  
ELAIHPEIQKRLQEECIENFKKGDGKITYELLQGMKYLDMVVSSEFRKWPPATALDRVCNKKYTL  
NVNDQEIVIEPEMLINCPVLGIHRDPKYYPNPDKFDPERFNDENK

>ON646398 CYP301B1 [526 AA] TRINITY\_DN49028\_c0\_g1\_i2|m.42573

MKCINKNIYKQIDYLNKLFVCDYRLLSSVHHNVSNNSNITSSGTTTIVAGDATQTEWNNAPVYEL  
MPGPKPLPLLGNTRWRFIPYIGNFEIEHIDQVSLRLYHQYGNIVKISGLLGRPDMVFVYDPDDIERVF  
RIEDSIMPHRPSMPSLNYYKHVLRKDDFGEDAGVIAVHGKNWHNFRTKVQQSMLQPRIAKLYIKP  
IEDTANAFVERVGLIRDQNNEMPDDFLNYVHKWSLESIAKVALDVRLGCLDEPSNAETQCMIDAV  
NTFFINVPVLELKIPFWKLFNTPTWNKYIKALDTITEISLKHINKALDNLKQGNVGSEPSLVQRILQS  
EKNPKIACILALDMFLVGIDTTSNAVASILYQLSLHPEKQENLFTLQKVLDPKNTNITSKHMEEM  
PYLRACIKETLRMYPVVIGNGRCTVNDQVIRGYQVPKGVQIIFQHYVISNLEKYFYKPNFLPERW  
LKTDKAECKAHPFASLPFGHGRRMCLGRRFADLEMQMIVAKVNSRKAFVHLLDPYTGKYLTF

>ON646399 CYP301B1 [542 AA] TRINITY\_DN49028\_c0\_g1\_i4|m.42575

MKCINKNIYKQIDYLNKLFVCDYRLLSSVHHNVSNNSNITSSGTTTIVAGDATQTEWNNAPVPEL  
MPGPKPLPLLGNTWRFIPYIGNFEIEHIDQVSLRLYHQYGNIVKISGLLGRPDMVFVYDPDDIERVF  
RIEDSIMPHRPSMPSLNYYKHVLRKDDFGEDAGVIAVHGKNWHNFRTKVQQSMLQPRIAKLYIKP  
IEDTANAFVERVGLIRDQNNEMPDDFLNYVHKWSLESIAKVALDVRLGCLDEPSNAETQCMIDAV  
NTFFINVPVLELKIPFWKLFNTPTWNKYIKALDTITEISLKHINKALDNLKQGNVGSEPSLVQRILQS  
ENNPKIACILALDMFLVGIDTTSNAVASILYQLSLHPEKQENLFTLQKVLDPDKNTNITSKHMEEM  
PYLRACIKETLRMYPVVIGNGRCVTNDVCIRGYQVPKGQVQIIFQHYVISNLEKYFYKPNFLPERW  
LKTDAAECKAHPFASLPFGHGRRMCLGRRFADLEMQMIVAKMIRNYKIEYHYKKLDYFIHPM  
YTPNGPLRLRLDRQS

>ON646400 CYP4420A1 [516 AA] TRINITY\_DN49399\_c0\_g1\_i1|m.43968

MPYFIIFNTLLLLLTILTFIILYLTWNYNWYKERNIPFVKPSLIFGNIKDQILMRKSFSDVFHEIYTN  
FNDCKYVGFYLWRKPALVIRDPELIKMWWSKQFSNFYNNAWYLSEKVDPYFSKSPFFENDEKWK  
ELRHQLTPTLSPGRIKSLFPVFLQGIDELHNFIIKKNAINDKNEIDLRLDLSKYTTEVSTQAFFGVKA  
HAFDNENSDFLNVGKLIFRNSVRSSFESICMMCDKLFAHYFRVKIVNEKAFFDKKLAVEIMEYRK  
TNNNCQYNDYFEHLLGLRETYKEYEDVNNIARQLITVFFDSADTTASGITIAMFQIIRHPEVYKKL  
RNEIDTILLKYNGQLTVEAIQDMNYLDMCISEAFRLNVPLYFSLRDCTVPTEFPMPKEAQTGSSL  
VEPGITIIVPMHEIHRDLKYFNDPDPVDPERFSDERKSTIQKGTYPFGDGPRMCLGKNFAIAAVKH  
FIIALVQNYDIKFKPNSNYTLTPNVGIMLNVVLFKQKFMNLFAKRGEFYVE

>ON646401 CYP4418B1 [436 AA] TRINITY\_DN49382\_c1\_g1\_i1|m.44269

GVYFGRHPVLFVRDSQLARDVMVKYFNHFQDNTININDKSEPLVAKNPFVLKGEQWRSKRGHLT  
PGFTALKLKQMFPHMVAVERLVAYLHQIDSSQNSIEAKEVASCFATEVFTLSALNITSDFSFP  
KSSFKTIAKTMLEGSNLLAFITWTVAVDPGLSVLLRTKILKEGADYFRKAVNDVLVHRETNNIV  
VNDIFNHFYTLYQKNADFTKDDLVSNNVTLFIDGVETSATTIRCILYEIAAQPRVYKKLRKEIDTIL  
SKNNNKFTYDGIQEMTYLDSCISEGLRIYSAVLFAVRQCTLPFEFPSQKDGEPPGVKIDKGISVVLFP  
YSIHHDENLYPNPEEYKPERFYDDETKVQAKANLFGFGDGPRICLGMRYGLMVTRLGIATHSKLD  
VTVNEKSKERAKNTGPSFLFAPNVEPIVDFHKGRTIYKDN

>ON646402 CYP4XL1 [384 AA] TRINITY\_DN49641\_c3\_g5\_i1|m.45797

GLLTSTGDKWRTRRKILTPAFHFNLKGFIPFEGQSEHSMEDIDKECPKSESNNVPIIVKHSLSLCE  
TTMGLNIESEQKGIQTYKSNIHEFGDIFTDRMAKPWFYSEITYAFTPQRWRLYTIKSLRTFTSNVIK  
ERLTNWDLTQVQNTKNLDTGKYKLPMMDLLIKQMKLDNSLSYEDIREEVDTFMFEGHDTTSMG  
LSLFLMLLANHPEIQNKIYEEMKTIFGDSKRQATYDDLMEPTYLERCIKESRLRYPAVPVVGRTLT  
EDLVLKDYVLPAGIYVYVLIYDLHRNPYWPNNPKFDPDRFLPENSVKRNPFTYVPFSAGPRNCIG  
QKFAILEMKSFSVKIIEYILEPVDTPQTVSLKTDVVIRPSKPVRVKFRKRQ

>ON646403 CYP4XL1 [507 AA] TRINITY\_DN51971\_c0\_g4\_i2|m.58098

MYLVIGLILFVLALILWANREHWQLRIYKHVKDIPGPPSIPFIGNILPYVGTLDVIWKHARNLAIEY  
DGLYKIWAGNRCAIFISDPNYNEIILSSTKNIEKSEPNLLESWLGGLLISGGEKWKSRRKILTPAF  
HFHILKQFINVFEEQSDRTVKMIQEECDKPYTNVIPLAAEHALCALCETTMGIKMDNYENLQDFN  
RYKEAIYQFGHLFMDRVKNPLLYSEKIYSYTPMARVTKKLYGILKKFTLRVIDERLASWDDEQKK  
IGMTSASGKQLFPMLDILITEMKNGGDINYGIREEVDTFMFEGHDTTSMGLSFLLMLLAQHPEV  
QEKILEEQNQIFNGDNRIATYEDLQNMKYLEMVIKESRLRYPAVPVLGRKVTEDVQLGPYTIPAD  
VQVYIVVFDTHHNPFWPDPYKFDPPDRFLPDNCAKRHPFAYIPFSAGSRNCIGQRFVMLEMKSFV  
TKILREYILEPVDDLKVVMMKIDLVRPLNDNLRVKFRRRNDNNNTK

>ON646404 CYP4XL1 [392 AA] TRINITY\_DN51971\_c0\_g4\_i8|m.58109

GLLISGGEKWKSRRKILTPAFHFHILKQFINVFEEQSDRTVKMIREECDKPYTNVIPLAAEHALCAL  
CETTMGIKMDNYENLQDFNRYKEAIYQFGHLFMDRVKNPLLYSEKIYSYTPMARVTKKLYGILK  
KFTLRVIDERLASWDDEQKKIMTSASGKQLFPMLDILITEMKNGGDINYGIREEVDTFMFEGHDT  
TSMGLSFLLMLLAQHPEVQEKILEEQNQIFNGDNRIATYEDLQNMKYLEMVIKESRLRYPAVPVL  
GRKVTEDIQLGPYTIPADVQVYIVVFDTHHNPFWPDPYKFDPPDRFLPDNCAKRHPFAYIPFSAGS  
RNCIGQRFVMLEMKSFVTKILREYVLEPVDDLKVVMMKIDLVRPLNDNLRVKFRRRNDNNNTK

>ON646405 CYP4XL2 [470 AA] TRINITY\_DN49666\_c2\_g7\_i2|m.45817  
MYFIIQFLAQALLSVILVFIATILIIHWKYPIHWKYRIYKLGQDIPGPPSIPFIGNFIPFLGPLDHIWRIFR  
KLSLHYNGIFKVWTLNRFVSFISEPDYVEVLLSSAKNLRKSEAYDFLELWLGSGLLISDGDKWKS  
RKLLTPAFHFNILKQFVTVFEEQSERVTQIIRKECDKPFTNVIPISTEHALGALCETTMGIKMNFDD  
NNSEFIKYKNAIYHFGEIFMERITKPIFYSQFLFELSSMGKITNKIITTLRNFTLNVIDERLNNWETR  
QQMIKSASGKLLPMDILITEMKNGANIDYNGIVEEVDTFMFEGHDTTSMGISFMLMLLASEPE  
VQDKILEEQNSIFNGSTRMATYEELQNMEYLERVIKESLRLCPPVPVIGRRLEEDLQMGQYIIPKES  
YLVSIIYDLHHNPKYWDDPEKFDPRFLPDNAAQRHPFAYVPFSAGSRNCIGQRFVMLEMKSFV

>ON646406 CYP9GM1 [446 AA] TRINITY\_DN49864\_c2\_g1\_i1|m.46606  
MILELIGVLIVIYLLHLYFMKGYDYWEKRGIPSYRRFHPYIEFLNMLFQRTTMYDDIIGVYNGLPD  
KKVHGINILKIPQVFVKDPDILRNICVKDFDHFNNHVDIFLQADPLFGKSLFVLKDKKWRDMRNIL  
TPVFTGSKLRGLCELISECGTQTMHYSEMCRQKQNNVLKIDFLDACTRFTNDVIASVAFGIKVN  
LTHPNNEFFHAGHEISKFATWRMFLIFKFPSLCKIFKIRFAPNYVYDFFTNITESTLRARKEQNIMRY  
DIIYLLTEAQKEQIKNDPSSKNILTTEDITSQVVIFFLAGYANVAIIMAFAYELALQPDQLKRLQKE  
IDTVLKENNGKLDYDVIKSMKFLDMIVTETLRKWPPSAALDRQCCKSFEIDTNNNETITVKPGMVI  
NIPVMGLHYDPKYYPNPEKFDPERFNDENKAKLNPYTYLPFGYGPR

>ON646407 CYP9GM1 [459 AA] TRINITY\_DN49864\_c2\_g1\_i3|m.46609  
MKIPIYLYFLIHKMILELIGVLIVIYLLHLYFMKGYDYWEKRGIPSYRRFHPYIEFLNMLFQRTTMY  
DDIIGVYNGLPDKKVHGINILKIPQVFVKDPDILRNICVKDFDHFNNHVDIFLQADPLFGKSLFVLK  
DKKWRDMRNILTPVFTGSKLRGLCELISECGTQTMHYSEMCRQKQNNVLKIDFLDACTRFTND  
VIASVAFGIKVNLSLTHPNNEFFHAGHEISKFATWRMFLIFKFPSLCKIFKIRFAPNYVYDFFTNITEST  
LRARKEQNIMRYDIIYLLTEAQKEQIKNDPSSKNILTTEDITSQVVIFFLAGYANVAIIMAFAYELAL  
QPDQLKRLQKEIDTVLKENNGKLDYDVIKSMKFLDMIVTETLRKWPPSAALDRQCCKSFEIDTN  
NNETITVKPGMVINIPVMGLHYDPKYYPNPEKFDPERFNDENKAKLNPYTYLPFGYGPR

>ON646408 CYP9GM1 [372 AA] CYP9GM1\_TRINITY\_DN49864\_c2\_g1\_i5|m.46611  
MILELIGVLIVIYLLHLYFMKGYDYWEKRGIPSYRRFHPYIEFLNMLFQRTTMYDDIIGVYNGLPD  
KKVHGINILKIPQVFVKDPDILRNICVKDFDHFNNHVDIFLQADPLFGKSLFVLKDKKWRDMRNIL  
TPVFTGSKLRGLCELISECGTQTMHYSEMCRQKQNNVLKIDFLDACTRFTNDVIASVAFGIKVN  
LTHPNNEFFHAGHEISKFATWRMFLIFKFPSLCKIFKIRFAPNYVYDFFTNITESTLRARKEQNIMRY  
DIIYLLTEAQKEQIKNDPSSKNILTTEDITSQVVIFFLAGYANVAIIMAFAYELALQPDQLKRLQKE  
IDTVLKENNGKLDYDVIKSMKFLDMIVTGNKIITKPPF

>ON646409 CYP9GM1 [391 AA] TRINITY\_DN51063\_c0\_g2\_i1|m.53754  
FGKSLFALKDKKWRDMRTILSPVFTGSKLRGLCELISECGTQTMHYSEMCRQKQNNVLKIDFLD  
ACTRFTNDVIASVAFGIKVNLSLTHPNNEFFHAGHEISKFATWRMFLIFKFPSLCKIFKIRFAPNYVY  
DFFTNITESTLRTRKEQNIMRYDIIYLLTEAQKEQIKNDPSSKNILTTEDITSQVVIFFLAGYANVAI  
MAFAAYELALQPDQLKRLQKEIDTVLKENNGKLDYDVIKSMKFLDMIVTETLRKWPPSAALDRQ  
CNKSFEINTNNNETITVKPGMVINIPIMGLHYDPKYYPNPEKFDPERFNDENKAKLNPYTYLPFGY  
GPRVCIASRFVILETKTFLIHLLSKFNVVTEKTPPIRLVRGSILKPD TDFGLGLQLRQ

>ON646410 CYP4417A1 [447 AA] TRINITY\_DN50148\_c0\_g1\_i1|m.48533  
YSNIFLDSKQFLFSYPNAVVLSESYNNGYSIDIFELLWRVVASGESKLLSSHKTQKMYAYDLVKYS  
FGEGFLSSGAVYRNSHRLIQPTFHHDVLETYIQLFKKNGDFLVESLRENVGKEAFDIFRKVNLCII  
KNVVDTLMDTKMTPEITDELYFSLNRLYNIHERLFKPWLHPEFIFKLT SIGKEERKS AKY LQNFIR  
NVIKSKKMELSLASDDSEYASNSKRRSTLDFLLRKL NENPNVMSEELLVDNISTIFLAAQDATSIQY  
SFAVLMFGMYPNFQDKIYEEIQVLGQESTFTISDLNQLVYLD MFLNECLRLLPPIFIGRKVTEDLQ  
FENFVAPAGCSIIVNTYEIHRNPKYWEKPNEFYPEHFTPENVAKRHPMAFIPFSAGPRRCIGRQYAV  
YVLKTLIISTLRSYKIEADGTLQDLNITGDLACRVKDG YKIRIKYRN

>ON646411 CYP4417A1 [495 AA] TRINITY\_DN50148\_c0\_g3\_i1|m.48534  
MGVEILYPLVYSFLITFLIAYYWKRRHLYIASFKIDGPISFPLIGNSYLFFGSSQEDVFSKSMEMIQSY  
SSTCRFWRGSQLLICIKNIKDIEKLLSSHKTQKMYAYDLVKYSFGEGFLSSGAVYRNSHRLIQPT

FHHDVLETYIQLFKKNGDFLVESLRENVGKEAFDIFRKVNLCIIKNVVDLMDTKMTPEITDELYF  
SLNRLYNIIHERLFKPWLHPEFIFKLTSIGKEERKSAKYLQNFIRNVIKSKKMELSLASDDSEYASNS  
KRRSTLDFLLRKLNENPNVMSEELLVDNISTIFLAAQDATSIQYSFAVLMFGMYPNFQDKIYEEIQ  
KVLGQESTFTISDLNQLVYLDNFLNECLRLPIPIFIGRKVTEDLQFENFVAPAGCSIIVNTYIEHRNP  
KYWEKPNEFYPEHFTPENVAKRHPMAFIPFSAGPRRCIGRQYAVYVLKTLIISTLRSYKIEADGTLQ  
DLNITGDLACRVKDGKIRIKYRN

>ON646412 CYP4417A1 [384 AA] TRINITY\_DN50148\_c0\_g1\_i2|m.48535  
MGVEILYPLVYSFLITFLIAYYWKRRHLYIASFKIDGPISFPLIGNSYLFFGSSQEDVFSKSMEMIQSY  
SSTCRFWRGSQLLIKNIKDIEKLLSSHKTTQKMYAYDLVKYSFGEGFLSSGAVYRNSHRLIQPT  
FHHDVLETYIQLFKKNGDFLVESLRENVGKEAFDIFRKVNLCIIKNVVDLMDTKMTPEITDELYF  
SLNRLYNIIHERLFKPWLHPEFIFKLTSIGKEERKSAKYLQNFIRNVIKSKKMELSLASDDSEYASNS  
KRRSTLDFLLRKLNENPNVMSEELLVDNISTIFLAAQDATSIQYSFAVLMFGMYPNFQDKIYEEIQ  
KVLGQESTFTISDLNQLVYLDNFLNECLRLPIPIFIGRKVTEDLQFGN

>ON646413 CYP4417A1 [392 AA] TRINITY\_DN50148\_c0\_g1\_i5|m.48536  
MYAYDLVKYSFGEGFLSSGAVYRNSHRLIQPTFHHDVLETYIQLFKKNGDFLVESLRENVGKEA  
FDIFRKVNLCIIKNVVDLMDTKMTPEITDELYFSLNRLYNIIHERLFKPWLHPEFIFKLTSIGKEER  
KSAKYLQNFIRNVIKSKKMELSLASDDSEYASNSKRRSTLDFLLRKLNENPNVMSEELLVDNISTIF  
LAAQDATSIQYSFAVLMFGMYPNFQDKIYEEIQKVLGQESTFTISDLNQLVYLDNFLNECLRLPIPI  
FIGRKVTEDLQFENFVAPAGCSIIVNTYIEHRNPKYWEKPNEFYPEHFTPENVAKRHPMAFIPFSAG  
PRRCIGRQYAVYVLKTLIISTLRSYKIEADGTLQDLNITGDLACRVKDGKIRIKYRN

>ON646414 CYP9GK2 [409 AA]  
TRINITY\_DN50479\_c1\_g1\_i4|m.50192MFYILLGLAVVIFLYREIYRSLYYWEDKGIKQVRSIPVGN  
FIWSILQRTPF AESSQLYYNALPNEKCGIMAFNKPTLVIRDKNLIKQIGIKDFDNFTDHQKLFF  
KEGFDRLFDRNFLSLDGQPWRDMRATLSPAFTGAKMRGMFQIINECGEQMAAFYLNEIKKL  
GGDSKHIELELKDSFTRFTNDVIATSAGVVKCDSFKDKNNEFYSNRGNATQFQTWRIVLVNF  
PAVMKMLNIYTIPISVCDYFRNIVKETVTVRERENIVRPDMLHLLMQAQKGTCLKTENQIEDN  
KGFAAVNESTNAHGKAKLLDDEDVAAQAFIFFLAGFETVSTAMCFTSYELALNPDIQQRCYE  
EIQEIVESNDGKLSYDVIQKIKFLDMVISESLRKWPPAIFTDRVCTKPYTFNVNG

>ON646415 CYP9GK2 [372 AA] TRINITY\_DN51063\_c1\_g3\_i1|m.53766  
EQMAAFYLNEIKKLGDSKHIELELKDSFTRFTNDVIATSAGVVKCDSFKDKNNEFYSNRGN  
ATQFQTWRIVLVNFIPAVMKMLNIYTIPISVCDYFRNIVKETVTVRERENIVRPDMLHLLMQA  
QKGTCLKTENQIEDNKGFAAVNESTNAHGKAKLLDDEDVAAQAFIFFLAGFETVSTAMCFTSY  
ELALNPDIQQRCYEEIQEIVESNDGKLSYDVIQKIKFLDMVISESLRKWPPAIFTDRVCTKPYTF  
NVNGKDVLLKGTNIQFPIYAIHRDPQNYPNPEKFDPERFSDENRHSIDPMTYLPFGVGPRICI  
GSRFALMEVKIVIVHLVKNFEIILTKKSTVPPRMTRKSTNMTIEGGFNVGLKARTH

>ON646416 CYP9GN3 [441 AA] TRINITY\_DN50416\_c2\_g2\_i2|m.50480  
VYAFGLPQFMKDPDIIRNICVKDFDHFVNHIDAFFKHDLRFGLSKSLFALKDKKWRDMRTIMTP  
VFTGSKLRGLVQLLSECGEQINLHYAQKYKDQDDKVLKIDIMDISTRFTNDVIASAVFGIKVN  
SLTDPENEFYLAGNEIIFPAWRFIMIMMLPSLSKLTGMGFASKHIYDFFIKLVEDTIRIRTERNI  
IRYDIIHLLLEARKEQIKAIETKRASNENVDVLSKNLLTDEDITAQAFIFFLAGYSNVAILMSFA  
AYELAVHPDVQVKLQKEIESLIKENGKLDYDVIKKMKYLDMMVSETLRKWPLPAIDREC  
KAYKIETNNDIIEVKPGMIISIPVLGLHYDPKYFPNPNKFDPERFNDENKAKMNPYTYMPFGIG  
PRICIANRFVILETKLFLINLLKFDILPTEKTPIPLVLAGGNVLKPKDDFSLGLKLRN

>ON646417 CYP9GN3 [366 AA] TRINITY\_DN50852\_c3\_g1\_i3|m.52316

MIFVILATHIALGLAHYYFTKQFKYWEEHGIHHIKCNRYMETYRFLFKKFVMYDDLMEADYN  
VFPDKQVYGVYAFGLPQLMIKDPDIIRNICVKDFDHFVNHIDAFFKHDRFLFGKSLFALKDKK  
WRDMRTIMTPVFTGSKLRGLVQLLSECGEQINLHYAQKYKDQDDKVLKIDIMDISTRFTNDV  
IASAVFGIKVNSLTDPENEFYLAGNEIKFPAWRFIMIMMLPSLSKLTGMGFASKHIYDFFIKLV  
EDTIRIRTERNIIRYDIIHLLLEARKEQIKAIETKRASNENVDLVSKNLLTDEDITAQAFIFFLAG  
YSNVAILMSFAAYELAVHPDVQVKLQKEIESLIKENGKLDYDVIKMKY

>ON646418 CYP9GN4 [398 AA] TRINITY\_DN50860\_c2\_g1\_i3|m.52536

HQDVFFRNDEMLGKNLFALKDKKWRDMRTILSPVFTGSKLRGLCELMSECGSQTVTYVQK  
MKQQNNNNPLKVDIFDACTRFTNDVIASTAFGIKVNSLADKNNEFFGVGQKVSSFSSWRLWL  
FNLPLFVKQAFNIKIFPEDVYKFFRQIVNETIRVRAEKNIIRHDMIHLLMEARKEQIKRTEASNG  
KVDNISASNNVLTNDDITAQGVIFFIAGFSNVALAISMASYEMAVNPEIQKKAYAEITEVLKA  
NNGKIDYDVIKQMKYLEMISETLRKWSPVVVGDRVCNKAFKIETPNDGVINVEPGMTINIPIS  
GLHNDPKYFPNPKKFDPERFNDTNKSKMNPYTYIPFGLGPRICIGKYVIFVETHAWRKMCSL  
WTHKNILSEVLNNSVHTINW

>ON646419 CYP9GN4 [410 AA] TRINITY\_DN50860\_c2\_g1\_i4|m.52538

HQDVFFRNDEMLGKNLFALKDKKWRDMRTILSPVFTGSKLRGLCELMSECGSQTVTYVQK  
MKQQNNNNPLKVDIFDACTRFTNDVIASTAFGIKVNSLADKNNEFFGVGQKVSSFSSWRLWL  
FNLPLFVKQAFNIKIFPEDVYKFFRQIVNETIRVRAEKNIIRHDMIHLLMEARKEQIKRTEASNG  
KVDNISASNNVLTNDDITAQGVIFFIAGFSNVALAISMASYEMAVNPEIQKKAYAEITEVLKA  
NNGKIDYDVIKQMKYLEMISETLRKWSPVVVGDRVCNKAFKIETPNDGVINVEPGMTMNIPI  
SGLHNDPKYFPNPKKFDPERFNETNKLKINPYTYIPFGLGPRICIANRFVLIETKILLFHILKTFEI  
VTTDETPIPMVLEKGAVIKPKGDTYGLAF

>ON646420 CYP305W3 [494 AA] TRINITY\_DN50925\_c0\_g2\_i2|m.52722

AVLFLILLSVFIILLIIRSIKKPYNYPPGPSWLPIVGCQPTFKKKLMKHGAMYLGLQELADEY  
NTNILGLKLKGKDQIICVFGYERVKEVLTNDDFAGRPDGFLLRLRTFGMRKGITFTDGPVWHE  
QRSFVMRHLRDVGFGKKSMELKIINECQDLIQFINENGPDINMEEFFAPSVLSVLWDLTAGRS  
LDRNDDKLKELLALLKRRLKAFDLSGGLLGQMPWLRFIPEKSGFNLVTKLNEQMRNFFMEA  
ILEHHATFTGDDSDLIYAFIQEMKIQQKEEKKDSTFTNDQLLAVCLDLFIAGSQTTNSLSGFLF  
YNLLCYPDIKVKILNEIDANIPKSRMPELADRVKLPYLEAFIMETRRMQPVAGVAGPRRVLHD  
YQMDKYNLEKDVTVLISIVSVHMDKEYWKDPEVFRPERFIGKDGLLYPNERILNFGLGKRRCL  
LGEALGKDCIFLFFTGILQKFDVLPVSNIPPLKRAYAGITMTPDPFSIRFVNR

>ON646421 CYP305W2 [364 AA] TRINITY\_DN50925\_c0\_g1\_i2|m.52723

MAVLFLILLSVSVILLIIRSIKKPYNYPPGPSWLPIVGCQPIFKKRLMKHAGAMYLGLQELADE  
YNTNILGLKLKGKDQIICVFGYERVKEVLTNDDFAGRPDGFLLRLRTFGMRKGITFTDGPVWH  
EQRSFVMRHLRDVGFGKKSMELKIINECQDLIQFINENGPDINMEEFFAPSVLSVLWDLTAGR  
SLDRNDDKLKELLALLKRRLKAFDLSGGLLGQMPWLRFIPEKSGFNLVTKLNEQMRNFFME  
AILEHHATFTGDDSDLIYAFIQEMKIQQKEEKKDSTFTNDQLLAVCLDLFIAGSQTTNSLSGFL  
FYNLLCFPDIKVKILKEIDANIPKSRMPELADRVKYVYFTKNFALIMYD

>ON646422 CYP305W2 [495 AA] TRINITY\_DN50925\_c0\_g2\_i5|m.52729

MAVLFLILLSVSVILLIIRSIKKPYNYPPGPSWLPIVGCQPIFKKRLMKHAGAMYLGLQELADE  
YNTNILGLKLKGKDQIICVFGYERVKEVLTNDDFAGRPDGFLLRLRTFGMRKGITFTDGPVWH  
EQRSFVMRHLRDVGFGKKSMELKIINECQDLIQFINENGPDINMEEFFAPSVLSVLWDLTAGR  
SLDRNDDKLKELLALLKRRLKAFDLSGGLLGQMPWLRFIPEKSGFNLVTKLNEQMRNFFME  
AILEHHATFTGDDSDLIYAFIQEMKIQQKEEKKDSTFTNDQLLAVCLDLFIAGSQTTNSLSGFL

FYNLLCFPDIKVKILKEIDANIPKSRMPELADRVKLPYLEAFIMETRRMQPIAGVAGPRRVLHN  
YQMDKYLLAKDVTVLISIVSVHMDKEYWKDPEVFRPERFIGKDGLFY PNERILNFGLGKRRC  
PGEALAKDCIFLFFASILQKFDVLPVSNIPPLKRAYAGITMTPDPFSIRFVNR

>ON646423 CYP305W2 [448 AA] TRINITY\_DN50925\_c0\_g2\_i7|m.52731

MAVLFLILLSVSVILLIIRSIKKPYNYPGPSWLPVGCQPIFKKRLMKHAGAMYLGLQELADE  
YNTNILGLKL GKDQIICVFGYERVKEVLTNDDFAGRPDGGFLLRLRTFGMRKGITFTDGPVWH  
EQRSFVMRHLRDVVGFGKSMELKIINECQDLIQFINENGPDINMEEFFAPSVLSVLWDLTAGR  
SLDRNDDKLKELLALLKRRLKAFDLGGGLGQMPWLRFIPEKSGFNLVTKLNEQMRNFFME  
AILEHHATFTGDDSDLIYAFIQEMKIQKKEEKDSTFTNDQLLAVCLDLFIAGSQTTNSLSGFL  
FYNLLCFPDIKVKILKEIDANIPKSRMPELADRVKLPYLEAFIMETRRMQPIAGVAGPRRVLHN  
YQMDKYLLAKDVTVLISIVSVHMDKEYWKDPEVFRPERFIGKDGLFY PNERILNFGLGKIQF  
DKKDFS

>ON646424 CYP4G280 [567 AA] TRINITY\_DN51045\_c2\_g1\_i1|m.53567

MSTTFTSLDENTSSWSVAGATLYGLITSATLLVIYYWEQNKRFARLGNAIPGPPGVPFLGNA  
LEIFLSTPEELLVKALEYSKHYGKVVGWLGPYLVFLIDPRDVEVILNSHVHIDKSDEYKFF  
KPWLGEGLLISTGEKWRTHRKMIAPTFHMNILKSFMDVFNRLSLAVVKKMRKEIDREFDVH  
DYMSGITVDILLETAMGVKRTHSDNAGFDYAVAVMKMCDILHQRHYKFWMRFEPLFKLTN  
FAKKQLEYLGIIHGLTNKVIKTKKEEFLQNRVLGNENYFEQLDSDAAKIDQKEAKLSSQNN  
QSSDPNKGTPLRDDLDEIDEQDVGEKKRLAFLDLMIETAHSTQNLTDDEEIKKEEVDTIMFEGHD  
TTAAGSSFVLCLLGIYKDVQDKVYQELYDIFGNSDRPVTYLDTLEMKYLERVIMETLRLYPP  
VPIARKMNQEVKLASGDYTLVVGCTVVIGTYKIHHPDYYKNPDTFDPDNFLPERTQNRHY  
YSYIPFSAGPRSCVGRKYAMLKLVLLSTILRNYTIVSDLTEKDFRLTGDIILKRADGFRIRIQP  
RERVPV

>ON646425 CYP4416A7 [489 AA] TRINITY\_DN51185\_c2\_g2\_i9|m.54068

KIYIWNYYIRMCYYASKLPGPAYPIIGNGALLFGSHEEASHNLLDICLQYQKSLIRFWLGPIPV  
AVILDPEDIQEVLTNSNALEKSFLYHLIWDTTMGKSIFTSEVLEWKHHRGIIVKGFSPILKSYF  
KIFVEKINILTENLDLELNKETSFDIFKCLSRITLDSVCGSTMGVNINSHKHSESYFDAMHRLM  
NLMIVRLFSVIKLPFLLYRFTEDYKIASKCSKIIREFTENIIEKRSKYETIDNNNLIDVKANKKN  
EYKKPLLEYLMDFTKNDEEFTDTQLRDEVNTIIFAAAYETSANALSYVLLNLAHDKDIQTKVY  
NEILEVLGENNESSINFDDLPKFKYMEMVIKESMRRYSTVPFGRKACQDIKIGNYTIPKGITIG  
IMIMAAHLNENHWENPLKFYPERFTPENIKNRHPYSFIPFSAGSRNCIGIRYAWIVMKITLATL  
LSRYEFHTDLNLDELRFQFNLTLSLVNGHQVRITPRQKL

>ON646426 CYP4G282 [559 AA] TRINITY\_DN51463\_c0\_g1\_i2|m.55589

MTLIDAAGAEFASGPSPVFSATSVLYFLLAPAIALYLLYWRLSRNHMIKLAEKIPGPTGYPIIG  
NALDLIGKSPDIFKHVYARSFEFGSVVRLWIGPKLVVFLTDPRDVEVILSSHVYIDKSSEYRFF  
QPWLGNGLLISTGPKWRAHRKLIAPTFHLNVLKSFIDLFNANSRAVCAKMLKEAGKTFDCHD  
YMSECTVEILLETAMGVSKNTQESGYDYAMAVMKMCDILHLRHTKFWLRPDWLFNLTRHG  
KTQVALLDTIHSLTRKVIKRRKEDFKNKKITPVEIKKEVEEVTHSDTKGAVDGLSYGQSAGLR  
DDLVDVDDNDVGEKKRMAFLDLMIASQNGVNITDEEIKEQVDTIMFEGHDTTAAGSSFFLSM  
MGIHQHIQDKVIQELDGIFGSDRPATFADTLEMKYLERCLMETLRLYPPVPIARQLNEDLK  
LASAPYVLPAGCTVVVGTVKLHRREEIYPNPDEFNPDNLFPEKTANRHYAFVFPFSAGPRSC  
VGRKYAMLKLVLLSTILRNFVRVKSDDLKEKDFQLQADIILKRAEGFQVRLEPRKRTAKA

>ON646427 CYP4XE2 [484 AA] TRINITY\_DN51460\_c5\_g2\_i1|m.55692

MFLLLKIFFTLFIGLLIILYNQLRVCRYPVPSPLIPILGHIELGSTAEAIHTNILRLIDTYGK  
VIQLWIGPFDHYFISDIDITNKILSSTKLIKSHAYDLLAPWLGYGLLLSGGEKWHKRRKML  
TPAFHFTILEQSINTFTIASDIFVKNLKKHVDGGNFDVYPYITLLGLDIICQTAMGIDINAQMOS  
DSEYVTAVRDVCQIVFERIFSAIQSDFIFYNFTKNGKVFKKSLKILHNLTNKVIEERRQLLIDS  
MKNNTTKPNKIINKEVIDDLEVQEKKEKMFMDVLLKSTIDGKPLTNSDIREEVDTFMFEGH  
DTVSSGLSFTLYLLANHPEVQNQVFEEIREICGDDLKKHATLSDLNKMITYLEAVIKESMRIYP  
PVPIVGRKLSEDLPLENGVLRKNTRPSIMIYSIHHNPEYFPDPEAFKPERFLTQAQNKHYFSYIP  
FSAGSRNCIGQKFAMYEMKSTITNVIRHYKLFS

>ON646428 CYP9GK3 [487 AA] TRINITY\_DN51572\_c0\_g2\_i2|m.56121

MFTIFDQQEDLLTKNKFFNKICVFRLYGMFMFNTPTILVRDLDMMLKNILIKQFEYFVDHSNSL  
FQEDINPMLDKNLFSLKGNKWRDMRATLSPTFTGSKMRGMFQLINEVGEQFVDYFKNEIQT  
KNNGKPMNVELKDILTRFTNDVIASAAFGVKCDSLRDRNNEFYRMGAKVSNLSTWRMFINN  
FCPKLAKFFRIGLIPNEVCDYLRNIVETIKMRERENIVRPDMLQLLLDAKNGTIKQDKQKIET  
DNSFAAVEESNYTQIKKRIYLDEDDVAAQAFVFFMGGFDTVSIAMCFSVYELALHPQLERL  
YLENEQVLSENNGLTYDVLNKMKYLDMVISETLRKYPPPIFLDRICDKPYTVQIDGKEITLE  
KGTILTIPLYAMHTDPNYFPEPEKFDPHRFSDENADKIVPLTYIPFGSGPRNCIASRFALMEAKT  
AVYFMVKHFEILPNEKSIIPPRITTKRINVTMEDGFHVTLKPRNQGFI

>ON646429 CYP9GK3 [416 AA] TRINITY\_DN51572\_c0\_g3\_i1|m.56124

LDKNLFSLKGNKWRDMRATLSPTFTGSKMRGMFQLINEVGEQFVDYFKNEIQTKNNGKPMN  
VELKDILTRFTNDVIASAAFGVKCDSLRDRNNEFYRMGAKVSNLSTWRMFINNFCPKLAKFF  
RIGLIPNEVCDYLRNIVETIKMRERENIVRPDMLQLLLDAKNGTIKQDKQKIETDNSFAAVEE  
SNYTQIKKRIYLDEDDVAAQAFVFFMGGFDTVSIAMCFSVYELALHPQLERLYLENEQVLS  
ENNGLTYDVLNKMKYLDMVISETLRKYPPPIFLDRICDKPYTVQIDGKEITLEKGTILTIPLY  
AMHTDPNYFPEPEKFDPHRFSDENADKIVPLTYIPFGSGPRNCIASRFALMEAKTAVYFMVKH  
FEILPNEKSIIPPRITTKRINVTMEDGFHVTLKPRNQGFI

>ON646430 CYP9GK3 [530 AA] TRINITY\_DN51572\_c0\_g2\_i5|m.56126

MLIVVLVIFVIIAAYWLLITPLSHWEKRGIPYVKGLPIVGNFFWHTMKQTTFGDELVKIYNT  
YPEKKLYGMFMFNTPTILVRDLDMMLKNILIKQFEYFVDHSNSLQEDINPMLDKNLFSLKGNK  
WRDMRATLSPTFTGSKMRGMFQLINEVGEQFVDYFKNEIQTKNNGKPMNVELKDILTRFTN  
DVIASAAFGVKCDSLRDRNNEFYRMGAKVSNLSTWRMFINNFCPKLAKFFRIGLIPNEVCDY  
LRNIVETIKMRERENIVRPDMLQLLLDAKNGTIKQDKQKIETDNSFAAVEESNYTQIKKRIYL  
DEDDVAAQAFVFFMGGFDTVSIAMCFSVYELALHPQLERLYLENEQVLSENNGLTYDVL  
NKMKYLDMVISETLRKYPPPIFLDRICDKPYTVQIDGKEITLEKGTILTIPLYAMHTDPNYFPEP  
EKFDPHRFSDENADKIVPLTYIPFGSGPRNCIASRFALMEAKTAVYFMVKHFEILPNEKSIIPPR  
ITTKRINVTMEDGFHVTLKPRNQGFI

>ON646431 CYP9GL1 [374 AA] TRINITY\_DN51572\_c0\_g1\_i4|m.56125

MITHIVGIVTILVLFHYFTSTYEWKKRGIPYYQESNAYLESIRIFRKNAMNELIDQYNAFPDK  
IAYGIYFFRIPQLMVKDPELIRTICIKDFEFTNHQGQVFFQNDEILGKNLFALKDKKWRDMRTI  
LSPVFTGSKLRGLSELMSECGDQTAAYYVQKIKQQNDDKPLKVNIFDACARFTNDVIASAF  
GIKVNSLEDKDNDFFKIGQRVSSFSSWKLWLLGLPAVIREYFKIKIFDNDIYDFFRNIGNETITA  
RLEKNIRPDMIHLLLEARKEQIKRSEEGNGKIENLPQTNSILTNDIQAQGVIFVAGFTNVALT  
MSFAAYELAVNPKVQEELYAEIKETEKRNAKIDYDTIKQMKYFDMVISGLSK

>ON646432 CYP9GL1 [391 AA] TRINITY\_DN51572\_c0\_g1\_i6|m.56131

MITHVGIIVTILVLFHYFTSTYEYWKKRGIPIYYQESNAYLESIRIFRKNAMNELIDQYNAFPDK  
IAYGIYFFRIPQLMVKDPELIRTICIKDFEFTNHQGVFFQNDEILGKNLFALKDKKWRDMRTI  
LSPVFTGSKLRGLSELMSECGDQTAAYYVQKIKQQNDDKPLKVNIFDACARFTNDVIASTAF  
GIKVNSLEDKDNDFFKIGQRVSSFSSWKLWLLGLPAVIREYFKIKIFDNDIYDFFRNIGNETITA  
RLEKNIIRPDMIHLLLEARKEQIKRSEEGNGKIENLPQTNSILTNDIHAQGVIFFVAGFTNVALT  
MSFAAYELAVNPKVQEELYAEIKETEKRNAKIDYDTIKQMKYFDMVISETLRKWTPASATDR  
ICNKEFT

>ON646433 CYP4XD1 [414 AA] TRINITY\_DN51514\_c1\_g2\_i3|m.56406

MASNVTIFFVILILFIIKYLWSRRLHWNLRRIKHVVKHFPGPPCIPVLGCTIPLLGPLDHIWNEFR  
KMAKTYPEMYRLWGGNRCGIFLLEPDDSEILLSTRNLAKSEGYQYMHDLGNGLLSSGS  
KWKARRKILTSAFHFNILNEFVNVFEDNSEKSANYIKNNCNKDLDAIAVDHTMHSLCETT  
MGISVNMEDPDIKQYKDALHNFGSVFFNRLMRPWLTADEFIYNLSEIKRNQDRLIKAMHKFTL  
SVIEGRLLNWSLEGKQPLYASGKQILPMDLLIGEMKRGGDIDFEGIREEVDTFMFEGHDTT  
SAGLTFLMLLANHPEIQNRIYDEQLKIFNGSKRKATYDDLQNMAYLERCIKESRLRYPPVPII  
GRTLDEDIVLKNKLVMPSGIFANIMIYDLHRNPKEFW

>ON646434 CYP4XD2 [463 AA] TRINITY\_DN51514\_c1\_g2\_i4|m.56409

LVNKFYNYDILIVMASITVLLLIVILFIIKLLWANRLHWDYRIYQCVKHIPGPYNIPLLGC  
LPFIGTLEHLWDELRRATAKRFDPDIYKMWGGNRCGIFLLNADDIEMVLLSTKSLAKNDAYESIR  
DWLGDGLLISGGSKWKSRRKILTPAFHFNILNQFVNVFESNSEKSTNFIKNNCNKDLNANDLA  
VEHSLYSLCETTMGISIDMENPDIKQYKYALHNFGTTFYNRITRPWLYPDIFFNLSEIKRNQDR  
LIKAMHKFTLNVIEERLQNWSLEGKQPLYASGKQILPMDLLIGEMKRGGDIDYEGIREEV  
DTFMFEGHDTTSTGLTFLMLLANHPEIQNRIYEEQLTIFNDSKRKATYDDLQNMAYLERCV  
KESRLRYPPVPIIGRTLDEDIVLKSQYVMPSGIFVNMICDLHRNPKYWDPHPKFDPRFLPD  
NCVNRHPFAYIPFSAGSRNCI

>ON646435 CYP9GN2 [398 AA] TRINITY\_DN51723\_c1\_g4\_i1|m.57100

LFVLKDKKWRDMRNILTPVFTGSKLRGLVQLISNCGEKTVNHLVEELKEKNTKLLKIDIMDT  
TTRFTNDVIATSAFGIEVNSIKDPKNDFFMAGREIRFPMWRFFMMFFLPAVSKILDIRLAPRY  
VYDFLFNIINETIRVREEKNIVRPDMVHLLIEARKEQKKVIQKQAQNEVDVSVLTKNLLTNEDI  
VAQGFIFFAGYGNVAVILSFAAYELAVHPEIQKRLQDEISHVLNENNGQLDYDAIKKMKYL  
DMVLSETLRKWPLPIIDRECTKAYQIKSDDLTLAPGMGVQIPIAGFHYDPKYYPNPEKFD  
ERFSDENKANMNPYVYMPFGLGPRVCVAVRFVMIETKIFLIHLLRQFDVVVTEKTPIMVLKS  
GNVIRPKDDFNALVSRNE

>ON646436 CYP9GN2 [398 AA] TRINITY\_DN51723\_c1\_g4\_i2|m.57107

LFVLKDKKWRDMRNILTPVFTGSKLRGLVQLISNCGEKTVNHLVEELKEQNTKLLKVDIMDT  
STRFTNDVIATSAFGIEVNSIKDPKNDFFMAGREIRFPMWRFFMMFFLPAVSKILDIRLAPRY  
VYDFLFNIINETIRVREEKNIRPDMVHLLIEARKEQKKVIQKQAQNEVDVSVLTKNLLTNEDI  
VAQGFIFFAGYGNVAVILSFAAYELAVHPEIQKRLQDEISQVLNENNGQLDYDAIKKMKYL  
DMVLSETLRKWPLPIIDRECTKAYQIKSDDLTLAPGMGVQIPIAGFHYDPKYYPNPEKFD  
ERFSDENKANMNPYVYMPFGLGPRVCVAVRFVMIETKILLIHLRQFDVVVTEKTPIMVLK  
SGNVIRPKDDFNALVSRNE

>ON646437 CYP9GN2 [371 AA] TRINITY\_DN51723\_c1\_g4\_i3|m.57109

LFVLKDKKWRDMRNILTPVFTGSKLRGLVQLISNCGEKTVNHLVEELKEQNTKLLKVDIMDT  
STRFTNDVIATSAFGIEVNSIKDPKNDFFMAGREIRFPMWRFFMMFFLPAVSKILDIRLAPRY  
VYDFLFNIINETIRVREEKNIRPDMVHLLIEARKEQKKVIQKQAQNEVDVSVLTKNLLTNEDI  
VAQGFIFFAGYGNVAVILSFAAYELAVHPEIQKRLQDEISQVLNENNGQLDYDAIKKMKYL

DMVLSETLRKWPPLPIIDRECTKAYQIKSDDL TIDLAPGMGVQIPIAGFHYDPKYYPNPEKFDPERFSDENKANMNPYVYMPFGLGPRVCVAVRFVMIETKILLIHLRQFDRNIKLSQ

>ON646438 CYP9GN2 [508 AA] TRINITY\_DN51806\_c0\_g4\_i1|m.57639

MKIPIYLYFLIHKMILELIGVLIVYLLHLYFMKGYDYWEKRGIPSYRRFHPYIEFLNMLFQRTTMYDDIIGVYNGLPDKKVHGINILKIPQVFVKDPDILRNICVKDFDHFNNHVDIFLQADPLFGKSLFVLKDKKWRDMRNILTPVFTGSKLRGLVQLISNCGEKTVNHLVEELKEQNTKLLKVDIMDTSTRFTNDVIATSAFGIEVNSIKDPKNDFFMAGREIIRFPMWRFMMFFLPAVSKILDIRLAPRYVYDFLFNIINETIRVREEKNIRPDMVHLLIEARKEQKKVIQKQKAQNEDVSVLTKNLLTNEDIVAQGGIFFFAGYGNVAVILSFAAYELAVHPEIQKRLQDEISHVLNENNGQIDYDAIKKMKYLDMVLSETLRKWPPLPIIDRECTKAYQIKSDDL TIDLAPGMGVQIPIAGFHYDPKYYPNPEKFDPERFSDENKANMNPYVYMPFGLGPRVCVAVRFVMIETKIFLIHLRQFDVVVTEKTPIMVLKS

>ON646439 CYP9GN2 [495 AA] TRINITY\_DN51806\_c0\_g4\_i2|m.57641

MILELIGVLIVYLLHLYFMKGYDYWEKRGIPSYRRFHPYIEFLNMLFQRTTMYDDIIGVYNGLPDKKVHGINILKIPQVFVKDPDILRNICVKDFDHFNNHVDIFLQADPLFGKSLFVLKDKKWRDMRNILTPVFTGSKLRGLVQLISNCGEKTVNHLVEELKEQNTKLLKVDIMDTSTRFTNDVIATSAFGIEVNSIKDPKNDFFMAGREIIRFPMWRFMMFFLPAVSKILDIRLAPRYVYDFLFNIINETIRVREEKNIRPDMVHLLIEARKEQKKVIQKQKAQNEDVSVLTKNLLTNEDIVAQGGIFFFAGYGNVAVILSFAAYELAVHPEIQKRLQDEISHVLNENNGQIDYDAIKKMKYLDMVLSETLRKWPPLPIIDRECTKAYQIKSDDL TIDLAPGMGVQIPIAGFHYDPKYYPNPEKFDPERFSDENKANMNPYVYMPFGLGPRVCVAVRFVMIETKIFLIHLRQFDVVVTEKTPIMVLKS

>ON646440 CYP9GN1 [414 AA] TRINITY\_DN51806\_c0\_g2\_i1|m.57636

MLFVIIIGILIALYLLHLYFMKGQDYWKKRGVPTYQRSHPYKEFIRLILQKTSIYEDFISLYNGFPDKKVYGVNAFNVPQLVVKDPEIKNICVKDFDHFVNHDVFFKADPLFGRSLFAIKDKKWRDMRNILSPVFTGSKLRGLVQLISNCGEQTVKYLTEKCKEQDNKLLKVDLLDMTTRFTNDVIATAAFGIEVNSIQPNNEFFEAGREIIFPAWRVLIMFFLPMIAKIFEIRLAPKYVYNFLYNIINETIRVREEKHIVRPDMVHLLVEGRKEQKRMLEEKSAKNEDVSSLTNSLLTNDDIVAQGGIFFLAGYGNVAIIMSFAAYELAVQPELQKRLQDEIAHTLKENNGKLDYEVIKKMKYLDMVISETLRKWTPVTFIDRECTKAYQIKSDDL TVDVEPGMAITIPT

>ON646441 CYP9GN1 [458 AA] TRINITY\_DN51806\_c0\_g2\_i2|m.57637

MLFVIIIGILIALYLLHLYFMKGQDYWKKRGVPTYQRSHPYKEFIRLILQKTSIYEDFISLYNGFPDKKVYGVNAFNVPQLVVKDPEIKNICVKDFDHFVNHDVFFKADPLFGRSLFAIKDKKWRDMRNILSPVFTGSKLRGLVQLISNCGEQTVKYLTEKCKEQDNKLLKVDLLDMTTRFTNDVIATAAFGIEVNSIQPNNEFFEAGREIIFPAWRVLIMFFLPTIAKIFEIRLAPKYVYNFLYNIINETIRVREEKHIVRPDMVHLLVEGRKEQKRMVEEKSAKNEDMPSLTNSVLTNDDIVAQGGIFFLAGYGNVAIIMSFAAYELAVQPELQKRLQDEIAHTLKENNGKLDYDVIKKMKYLDMVIAETLRKWTPVTFIDRECTKAYQIKSDDL TVDVEPGMAITIPTVGFHYDPKYFPNPNKFDPERFSDENKERMNPYVYMPFGLGPRVC

>ON646442 CYP4XE3 [500 AA] TRINITY\_DN52387\_c0\_g1\_i2|m.60175

MLPLITFGLFIVVCLCIYCYQLSIRNKHKSIPCPPLVPVLGNCFEFSSSLEGLYFDILRLQRKYGKLFQIILGPFKHVFVFDADLMEKVMSTSKHSDKSMEYTFFKPWLGNGLLISSGSLWRKRRKMLTPAFHFTILQQAVDKFDENVNILVKNLEKYATTNEVFDIYPHVTLCVLDIICETAMDIKINAQTDSNSKYVCAVRNACCALQKRFFSVVDQSDFFFNFSRTGKMYNDSLKILHELSENKVIVERR EALIRRQSNYLINNEDFYKPKMIFLDTLLESTIDGRLLTNAEIREEVDTFMFEGHDTVSSAITFT

LYLLANHPLVQDRLF AEI KEVLGTDPSKPATLNDLNNLN YIELVIKESLRLYPPVPLVGRTLTE  
DLQWGDVSLSKGSQIVVVIHGAHRHEDYFPEPEVDFPERFLNNTSNKNAFAYVPFSAGPRNCI  
GQKFAMYEMKSTISKILRYYELESAGPGYDLKLIMTVIFKSMNGVHLKLKPRIY

>ON646443 CYP4236B1 [359 AA] TRINITY\_DN52543\_c2\_g3\_i1|m.61016

MQRQAISPIFTP KMMTEYMP SFSNHCELLKRKLQSIPNGKLIDVYAEIAPFTYDIVCETLLGTK  
VRFAQNTWKSEFFHLAELGYEIVFERMIKSLYQSDVLFYFSKRYNDYVKIQKLVDFNTRTILK  
DKQSDTQKPFDTCLDRILKHDLTEKQQMDATYVIFTASQESITTIISFVILMLAIHPDIQQKAHE  
ELDRVLGTEDDEIPFTIELLSLEYLDMCIKEVLRLYPIGHIIQRECKQDFRLNNDVVLPSGCSI  
GVGIYAMHRDPNIWPEPDKFIPERFTREAVLNRHPYAYVPFSAGPMNCIGKIYADLLMKSV A  
ATILRNNRFECDYKRVEEITLKTDISIRPQKGYPVRIYSR

>ON646444 CYP6YL1 [456 AA] TRINITY\_DN52759\_c6\_g1\_i2|m.61627

MALVVSLTIVLVVILFISVYCYVIRNFDYWRKRRIPYIEPTPFFGNIGSVFRCKESIGQCIATLHK  
QTNEPFVGIFTVDCPALLIRDLELMRHILIKDFNSFTDRNFAPDPEIEPLASHGLFCLTGDKWR  
NLRGKLTSAFISISRIKNMFYLVEQCAEPMNKILTKHAENNEPLDVKDFMARYTTDVISTCVFG  
VTGNAINDPNWDFYHIGRSVFKTSPLDSVKSGLLIFAPWFKLFGIRMINDSIYDAIRKSIWTAI  
DLRQKNNIIRNDFIDLLLQIREKSLAEDRRNDESVLFLDGDALVGQAFVFLGGYETSSTTMS  
LALYEMALNPVIQKQVRREIDRVLA KHNTMSYEAVHEMTYLNQVVSETLRKYPALPFLDR  
NCVKDYIIPGTNVKIDCGTKVFISLLSLHHDPEIFPNPEQFDPDRFTEENISKRHKFA YLPFGNG  
PRICIGKFH

>ON646445 CYP6YL1 [532 AA] TRINITY\_DN52759\_c6\_g2\_i2|m.61628

LIGHNGKWLNV PKGLNTCYNFLT KMALVVSLTIVLVVILFISVYCYVIRNFDYWRKRRIPYIE  
PTPFFGNIGSVFRCKESIGQCIATLHKQTNEPFVGIFTVDCPALLIRDLELMRHILIKDFNSFTDR  
NFAPDPEIEPLASHGLFCLTGDKWRNLRGKLTSAFISISRIKNMFYLVEQCAEPMNKILTKHAE  
NNEPLDVKDFMARYTTDVISTCVFGVTGNAINDPNWDFYHIGRSVFKTSPLDSVKSGLLIFAP  
WFKLFGIRMINDSIYDAIRKSIWTAIDL RQKNNIIRNDFIDLLLQIREKSLAEDRRNDESVLFL  
DGDALVGQAFVFLGGYETSSTTMSLALYEMALNPVIQKQVRREIDRVLA KHNTMSYEAV  
HEMTYLNQVVSETLRKYPALPFLDRNCVKDYIIPGTNVKIDCGTKVFISLLSLHHDPEIFPNPE  
QFDPDRFTEENISKRHKFA YLPFGNGPRICIGMRFGLLQTKVGLIYLLKNFEIEPLLETMKPIEF  
TSTNITLAIKHPLKLRIKKRTD

>ON646446 CYP4416A4 [487 AA] TRINITY\_DN52793\_c3\_g2\_i4|m.62078

WNYIRMCYYASKLP GPPIIIGNAKLFLGSHQEVTNKLINIAEKYQNMVRVWIGPVPLIGSS  
NPDIVQKLFTNEHVLEKAYLLKL VWNPMGKS VFTSEVTEWKHRSIVIRGFTPIILKS YFKIF  
VEKINILIQKLDLELNKETPFDIYK YLSRTTLD SVCGSTMGVNINSHDDDGSSSYFHAINSVTFE  
ILARFLNPIKYPTIFYRFTQDYK MVS KSRDVTQEFT EKKI SEKRKSMATLTNNNELMDIKAINN  
NAYKKPFLEYLMDFTKNNSNFTEEQLHNETNVLIFAGYETTAITLSFVLLHMAAYKDIQTKL  
YNEIIEVLGDKNVDSINVDDL PKLKYMEMVLKESLRLTPTVPLIPREASQDIKIDNYTIPKGAN  
ILIPINIHRNPEYWENPLKFNPERFTSENIKNRHPYAYLPFGAGPRSCLGRRYAWIFMKTALV  
ALLSRYEFHTDINLDTLRF EAGMALKLVNGYPVRITPRYKS

>ON646447 CYP4416A2 [537 AA] TRINITY\_DN52793\_c3\_g2\_i6|m.62081

MLDMGCNIYVGAELFLKNTMFLT VFIQFLQNHVLVSLFLILVLTCIYFWNYIRVCYYASKIP  
GPPIIIGNAIFLLGLSHQEFTHAILKIAEDYQQNLGRIWFGPIPAIGASNPDIVQELLTNENVL  
EKAYLMKKAWNPNVLGKSILTSEVPEWKHRSIIIRGFTPIILKS YFKIFVEKINILIQKLDLELNK  
ETPFDIFEYLSRTTLD SVCGSTMGVNINSHEDDGSSSYFHAVNSSLYLVVAPYLNPIKFFNIFYR  
FSQDYKMVLKNRDLTQEFTKKI SEKQKL MANVINNNELNNIKAINRN VYKKPFLEYLMDFT  
KNNSNFTEEQLHNETNVLIFAGYETTAITLSFVLLHMAAYKDIQTKLYNEIIEVLGDKNVDSIN

VDDLPLKLYMEMVLKESLRLTPTVPLIPREASQDIKIDNYTIPKGANILIPINIHRNPEYWENP  
LKFNPERFTSENIKNRHPYAYLPFGAGPRSCLGRRYAWIFMKTALVALLSRYEFHTDINLDTL  
RFEAGMALKLVNGYPVRITPRYKS

>ON646448 CYP4416A3 [536 AA] TRINITY\_DN52793\_c3\_g2\_i13|m.62083

MLDMGCNIYVGAELFLKNSMFLMVFMNFLQNHVLISLLLLILITCIYFWNYIRVCYYVSKIP  
GPPAYPIIGNAKLFWGSHAETHNLINMAEKYRNMVRVWIGPVPLIGSSNPDIVQKLFTNEHV  
LEKAYLLKLVWNPVMGKSVFTSEVTEWKHHSIVIRGFTPIILKSYFKIFVEKINILIQKLDLEL  
NKETPFDIYKYLSRTTLDSCVCGSTMGVNINSHDDDGSSSYFHAINSVTFFILARFLNPIKYPTIF  
YRFTQDYKMOVSKSRDVTQEFTEKIISEKRKSMATLTNNNELMDIKAINNNAYKKPFLEYLMD  
FTENNSSFTEEQLRNHTNLLIFGGYETTAISLSFVLLHLAAAYKDIQTKLYNEIIEVLGDINVDLI  
NVDDLPLKLYMDMVLKESMRLTPTTPVISREASQDIKIDNYTIPKGANILIPINIHRNPEYWE  
NPLKFNPERFTSENIKNRHPYAYLPFGAGPRSCLGRRYAWIFMKTALVALLSRYEFHTDINLD  
TLRFEAGMALKLVNGYPVRITPRYKS

>ON646449 CYP6YH1 [523 AA] TRINITY\_DN52853\_c3\_g1\_i1|m.62169

MAIITSNWNTDLLTLLAVVLTHIYFYFKSTFNYWKKRGVPYSEPNWIFGNFYDAITFKKNITSY  
FCEQYHKTDEKAYGLYIFQRPYLLLRDPELIKHVLVKDFSNIPTADSADVKGDEIGRHNMFMS  
KSVSGWRYIRSKLSPFFTSGKMKNMFGLLDQIGDQLTQQVKSHVKESLDAKEIARLYTTDVI  
VSTAYGIEVNSFSDKESVFSKVGKMMITFDLRRSLEFLCFFCPIMVKIFNFKLFSKVGSDFLRN  
VVMNAMAEREANNIKRPDLIEALITLKNKGTLEDSENKTGDIVANGNNVKNDLPPFKLEGDIL  
VAQAAVFFTAGFETTSSAISFTLYSLSYNPEIQIKLRKEIQAVIARNGGNFTYDCLKDMKYLDA  
CVKETLRLYPTLGFLDREAIDTYTFPGTNITIDKGTAVVISLEALHRDPQYFENPLVYDPERFM  
EDKNIVPYTYMPFGEGRNCIGARFGMMSTKVGLVHILKDFEVLTHKTAPPLEIDNKGFLTLTA  
KNGINLKFVPGTVYTE

>ON646450 CYP6YH1 [406 AA] TRINITY\_DN52853\_c3\_g1\_i6|m.62170

MAIITSNWNTDLLTLLAVVLTHIYFYFKSTFNYWKNRGVAYSEPNWIFGNFYDAITFKKNITSY  
FCEQYNKTDEKAYGLYIFQRPYLLLRDPELIKHVLVKDFNNFVPRTSADIKGDEIGRHNMFMS  
KSVSGWRYIRSKLSPFFSSGKMKNMFGLLDQIGDQLTQQVKSHVKESLDAKEIARLYTTDVI  
VSTAYGIEVNSFSDKESVFSKVGKMMITFDLRRSLEFLCFFCPIMVKIFNFKLFSKVGSDFLRN  
VVMNAMAEREANNIKRPDLIEALITLKNKGTLEDSENKTGDIVANGNNVKNDLPPFKLEGDIL  
VAQAAVFFTAGFETTSSAISFTLYSLSYNPEIQIKLRKEIQAVIARNGGNFTYDCLKDMKYLDA  
CVKETLRLYPTLGFLDREAIDTYTFP

>ON646451 CYP6YH3 [436 AA] TRINITY\_DN52853\_c3\_g1\_i7|m.62171

MAIITSNWNTDLLTLLAVVLTHIYFYFKSTFNYWKKRGVPYSEPNWIFGNFYDAITFKKNITSY  
FCEQYHKTDEKAYGLYIFQRPYLLLRDPELIKHVLVKDFSNIPTADSADVKGDEIGRHNMFMS  
KSVSGWRYIRSKLSPFFTSGKMKNMFGLLDQIGDQLTEQVKSHVNDSLDAKEIARFYTTDVI  
VSAAFGIQANSFSDKEAAFSKVGKFMFTMNLRRSLELLCFFWPIIAKIFNFKLFSKVGSDFLR  
NVVMNAMAEREANNIKRPDLIEALITLKNKGTLEDSENKTGDIVANGNNVKNDLPPFKLEGDI  
LVAQAAVFFTAGFETTSSAISFTLYSLSYNPEIQIKLRKEIQAVIARNGGNFTYDCLKDMKYLD  
ACVKETLRLYPTLGFLDREAIDTYTFPGTNITIDKGTAVVISLEALHRDPQYFENPL

>ON646452 CYP6YH2 [440 AA] TRINITY\_DN52853\_c3\_g1\_i10|m.62174

MAIITSNWNTDLLTLLAVVLTHIYFYFKSTFNYWKKRGVPYSEPNWIFGNFYDAITFKKNITSY  
FCEQYHKTDEKAYGLYIFQRPYLLLRDPELIKHVLVKDFSNIPTADSADVKGDEIGRHNMFMS

KSVSGWRYIRSKLSPFFTSGKMKNMFGLLDQIGDQLTQQVKSHVKESLDAKEIARLYTTDVI  
VSTAYGIEVNSFSDKESVFSKVGKMMITFDLRRSLEFLCFFCPIMVKIFNFKLFSKVGSDFLRN  
VVMNAMAEREANNIKRPDLIEALIALKNKGTTLEDSENKTEDGVANGITSKDDKPPFKLEGDVL  
VAQAAIFFTAGFESSSSAISFTLHSISYNPEIQTRLRKEIQTVISRNGGKFTYDCLKDMKYLDAC  
VKETLRLYPTLGFLDREAIDTYTFPGTNITIDKGTAVVISLEGLHRDPQYFENPLIYDP

>ON646453 CYP6YH2 [440 AA] TRINITY\_DN52853\_c3\_g1\_i15|m.62177

MAIITSNWNNTDLLTLLAVVLTHIIFYFKSTFNYWKKRGVPYSEPNWIFGNFYDAITFKKNITSY  
FCEQYHKTDKAYGLYIFQRPYLLLRDPELIKHVLVKDFS NFIPRTSADVKGDEIGRHNMFMSM  
KSVSGWRYIRSKLSPFFTSGKMKNMFGLLDQIGDQLTEQVKSHVNDSLDAKEIARFYTTDVI  
VSAAFGIQANSFSDKEAAFSKVGKFMFTMNLRRSLELLCFFWPPIAKIFNFKLFSKVGSDFLR  
NVVMNAMAEREANNIKRPDLIEALIALKNKGTTLEDSENKTEDGVANGITSKDDKPPFKLEGDV  
LVAQAAIFFTAGFESSSSAISFTLHSISYNPEIQTRLRKEIQTVISRNGGKFTYDCLKDMKYLDA  
CVKETLRLYPTLGFLDREAIDTYTFPGTNITIDKGTAVVISLEGLHRDPQYFENPLIYDP

>ON646454 CYP4416A5 [395 AA] TRINITY\_DN52979\_c0\_g1\_i5|m.62504

VLISLLLLILILTCIYFWNYIRVCYYASKIPGPPAYPIIGNAIFLLGLSHQEFTHAILKIAEDYQQN  
LGRIWFGPIPAIGASNPDIVQELLTNENVLEKAYLMKKAWNPVLGKSILTSEVPEWKHHRSIII  
RGFTPIILKSYFKIFVEKINILIQKLDLELNKETPFDIFEYLSRTTLDSVCGSTMGVNINSHEDDG  
SSYFHAINSAIFFIARLLNPIKLPSILYRFTRDYKMVSRSDVTHEFTKKIIESEKRKNKATVTNN  
KELMDIKAINSNLYKKPFLEYLMDFTENNSSFTEEQLRNETNFMIMAGYD TTALSLSYVLLHL  
AAYKDIQTKLYNEILEVVGDINVDLINVDDL PKLK YMEMVLKESMRLTPTIPLIVREPSQDIKI  
GNICL

>ON646455 CYP4416A5 [505 AA] TRINITY\_DN52979\_c0\_g1\_i6|m.62506

VLISLLLLILILTCIYFWNYIRVCYYASKIPGPPAYPIIGNAIFLLGLSHQEFTHAILKIAEDYQQN  
LGRIWFGPIPAIGASNPDIVQELLTNENVLEKAYLMKKAWNPVLGKSILTSEVPEWKHHRSIII  
RGFTPIILKSYFKIFVEKINILIQKLDLELNKETPFDIFEYLSRTTLDSVCGSTMGVNINSHEDDG  
SSYFHAINSAIFFIARLLNPIKLPSILYRFTRDYKMVSRSDVTHEFTKKIIESEKRKNKATVTNN  
KELMDIKAINSNLYKKPFLEYLMDFTENNSSFTEEQLRNETNFMIMAGYD TTALSLSYVLLHL  
AAYKDIQTKLYNEILEVVGDINVDLINVDDL PKLK YMEMVLKESMRLTPTIPLIVREPSQDIKI  
GNYIIPKGASILIFTIHRNPEYWENPLKFDPERFTAENIKNRHPYAYIPFSAGPRNCIGGRYA  
WIFMKTTLAALLSRYEFHTDINLDTLKFEAAITLKL VNGHQVRITPRYKS

>ON646456 CYP4416A5 [399 AA] TRINITY\_DN52979\_c0\_g1\_i13|m.62511

VLISLLLLILILTCIYFWNYIRVCYYASKIPGPPAYPIIGNAIFLLGLSHQEFTHAILKIAEDYQQN  
LGRIWFGPIPAIGASNPDIVQELLTNENVLEKAYLMKKAWNPVLGKSILTSEVPEWKHHRSIII  
RGFTPIILKSYFKIFVEKINILIQKLDLELNKETPFDIYKYSRTTLDSVCGSTMGVNINSHDDD  
GSSSYFHAINSVTFLILARCLNPIKYPTIFYRFTQDYKMVSKSRDVTQEFTEKIIESEKRKSMATL  
TNNNELMDIKAINNNAYKKPFLEYLMDFTKNNSNFTDEQLRNETNFMIMAGYD TTALSLSY  
VLLHLAAYKDIQTKLYNEIIEVVGDINVDLINVDDL PKLK YMEMVLKESLRLTPTVPLIPREAS  
QDIKIDNYTIPKG

>ON646457 CYP4416A5 [505 AA] TRINITY\_DN52979\_c0\_g1\_i22|m.62520

VLISLLLLILILTCIYFWNYIRVCYYASKIPGPPAYPIIGNAIFLLGLSHQEFTHAILKIAEDYQQN  
LGRIWFGPIPAIGASNPDIVQELLTNENVLEKAYLMKKAWNPVLGKSILTSEVPEWKHHRSIII  
RGFTPIILKSYFKIFVEKINILIQKLDLELNKETPFDIFEYLSRTTLDSVCGSTMGVNINSHEDDG

SSYFHAINSAIFFIIARLLNPIKLPSILYRFTRDYKMVSRSDVTHEFTKKIISEKRKNKATVTNN  
KELMDIKAINSNLYKKPFLEYLMDFTENNSSFTEEQLRNETNFMIMAGYDTTALSLSYVLLHL  
AAYKDIQTKLYNEILEVVGDLINVDLINVDDLPLKLYMEMVLKESMRLTPTIPLIVREPSQDIKI  
GNYIIPKGASILIPFTIHRNPEYWENPLKFDPERFTAENIKNRHPYAYIPFSAGPRNCIGGRYA  
WIFMKTALVALLSRYEFHTDINLDTLRFEAGMALKLVNGYPVRITPRYKS

>ON646458 CYP4416A6 [439 AA] TRINITY\_DN52979\_c0\_g1\_i14|m.62512

RNMIRVWIGPVPVIGSSNPEIVQELLTNEYVLEKGYLLKFVWNPVMGKSIFTSEVPEWRNHRR  
IVIRGFTPIILKSYFKIFVEKINILIQKLDLELNKETPFDIYKYLSTTLDSVCGSTMGVNINSHDD  
DGSSSYFHAINSVTFFILARFLNPIKYPTIFYRFTQDYKMVSKSRDVTQEFTEKIISEKRKSMAT  
LTNNNELMDIKAINNNAYKKPFLEYLMDFTENNSSFTEEQLRNHTNLLIFGGYETTAISLSFVL  
LHLAAYKDIQTKLYNEIIEVLGDINVDLINVDDLPLKLYMDMVLKESMRLTPTTPVISREASQ  
DIKIDNYTIPKGANILIPINIHRNPEYWENPLKFDPERFTAENIKNRHPYAYIPFGAGPRNCFGR  
RYAWIFMKATLVALLCRYEFHTDINLDTLKFEIGMALKLINGHQVQITPRY
